# Supplementary material for: Verruculosins A–B, New Oligophenalenone Dimers from the Soft Coral-Derived Fungus Talaromyces verruculosus
Source: MDPI journal article supplement (doi:10.3390/md17090516), 2019-09-02

## Supporting Information

# Verruculosins A–B, New Oligophenalenone Dimers from the Soft Coral-Derived Fungus *Talaromyces verruculosus*

Minghui Wang <sup>1,2,†</sup>, Longhe Yang <sup>1,†</sup>, Liubin Feng <sup>3</sup>, Fan Hu <sup>1</sup>, Fang Zhang <sup>1</sup>, Jie Ren <sup>4</sup>, Yan Qiu <sup>4,\*</sup> and Zhaokai Wang <sup>1,\*</sup>

<sup>1</sup> Technical Innovation Center for Utilization of Marine Biological Resources, Third Institute of Oceanography, Ministry of Natural Resources, Daxue Road 184, Xiamen 361000, China

<sup>2</sup> School of Nursing and Health, Qingdao Huanghai University, Linghai Road 1145, Qingdao 266427, China

<sup>3</sup> High-field NMR Center College of Chemistry and Chemical Engineering, Xiamen University, Siming South Road 422, Xiamen 361005, China

<sup>4</sup> Eye Institute of Xiamen University, Fujian Provincial Key Laboratory of Ophthalmology and Visual Science, School of Medicine, Xiamen University, Xiamen 361102, China

\* Correspondence: yanqiu@xmu.edu.cn (Y.Q.); wang@tio.org.cn (Z.W.); Tel.: +86-592-2188681 (Y.Q.); +86-592-2195562 (Z.W.)

† These authors contribute equally to this paper.

## Content

S1: Computational methods.

S2: Theoretical chemical shift and geometries for verruculosin B (**2**).

### References

S3:  $^1\text{H}$  NMR (600 MHz,  $\text{CDCl}_3$ ) spectrum of verruculosin A (**1**).

S4:  $^{13}\text{C}$  NMR (150 MHz,  $\text{CDCl}_3$ ) and DEPT spectra of verruculosin A (**1**).

S5: Expanded  $^{13}\text{C}$  NMR (150 MHz,  $\text{CDCl}_3$ ) and DEPT spectra of verruculosin A (**1**).

S6: Expanded  $^{13}\text{C}$  NMR (150 MHz,  $\text{CDCl}_3$ ) and DEPT spectra of verruculosin A (**1**).

S7:  $^1\text{H}$ - $^1\text{H}$  COSY NMR spectrum of verruculosin A (**1**).

S8: HSQC NMR spectrum of verruculosin A (**1**).

S9: HMBC NMR spectrum of verruculosin A (**1**).

S10: NOESY NMR spectrum of verruculosin A (**1**).

S11:  $^1\text{H}$  NMR (600 MHz,  $\text{CDCl}_3$ ) spectrum of verruculosin B (**2**).

S12:  $^{13}\text{C}$  NMR (150 MHz,  $\text{CDCl}_3$ ) and DEPT spectra of verruculosin B (**2**).

S13:  $^1\text{H}$ - $^1\text{H}$  COSY NMR spectrum of verruculosin B (**2**).

S14: HSQC NMR spectrum of verruculosin B (**2**).

S15: HMBC NMR spectrum of verruculosin B (**2**).

S16: NOESY NMR spectrum of verruculosin B (**2**).

S17:  $^1\text{H}$  NMR (600 MHz,  $\text{CDCl}_3$ ) spectrum of verruculosin C (**3**).

S18:  $^{13}\text{C}$  NMR (150 MHz,  $\text{CDCl}_3$ ) and DEPT spectra of verruculosin C (**3**).

S19:  $^1\text{H}$ - $^1\text{H}$  COSY NMR spectrum of verruculosin C (**3**).

S20: HSQC NMR spectrum of verruculosin C (**3**).

S21: HMBC NMR spectrum of verruculosin C (**3**).

S22: NOESY NMR spectrum of verruculosin C (**3**).

## S1: Computational methods.

All the quantum mechanical calculations were carried out using Gaussian 09 [1] and displayed by Avogadro [2]. The RDKit with MMFFs force field was performed for the conformational analysis [3]. The conformational searches were done within 5 kcal mol<sup>-1</sup> and with the large enough steps to find all low-energy conformers at least 5-10 times. The corresponding low-energy conformers were then used as the input structures for further geometry optimization with B3LYP/6-31G(d) method at the gas phase. For all optimized conformers, frequency calculations were performed to ensure the absence of imaginary frequency for energy-minimized conformers. The <sup>1</sup>H and <sup>13</sup>C NMR shielding tensors were calculated using GIAO (gauge-independent atomic orbital) technique with B3LYP method and 6-31G(d,p) basis set in the gas phase. The unscaled chemical shifts ( $\delta_u$ ) were computed as  $\delta_u = \sigma^o - \sigma^x$ , where  $\sigma^x$  was the Boltzmann averaged shielding tensor and  $\sigma^o$  was the shielding tensor for proton or carbon nuclei in TMS calculated at the same level of theory (31.7129 and 191.6329 ppm for <sup>1</sup>H and <sup>13</sup>C NMR chemical shifts, respectively). Boltzmann statistic based on relative free energies at 298.15 K was used in the computations.

The stereostructure assignment was based on the following methods [4].

Mean absolute error (MAE) was calculated as

$$\text{MAE} = \frac{\sum_i^n |\delta_u^i - \delta_{exp}^i|}{n}$$

Corrected mean absolute error (CMAE). The data were empirically scaled according to  $\delta_s = (\delta_u - \text{intercept})/\text{slope}$ . The *slope* and *intercept* were calculated by the linear regression of  $\delta_u$  against  $\delta_{exp}$ . The purpose of this approach was to remove systematic errors in the shift calculation. CMAE was then calculated as

$$\text{CMAE} = \frac{\sum_i^n |\delta_s^i - \delta_{exp}^i|}{n}$$

Max absolute error (MaxErr) showed the maximum absolute difference between the experimental and the calculated shifts ( $\delta_u$ ).

Corrected max absolute error (CMaxErr) showed the maximum absolute difference between the experimental and the scaled shifts ( $\delta_s$ ).

Correlation coefficient (*r*) suggested the correlation between calculated and experimental shifts.

DP4 probability. When only one set of experimental data was assigned to one of several possible diastereoisomers, the DP4 probability was applied to make accurate assignment among many diastereoisomers [5]. The detailed DP4 calculations see reference 5 in the supporting information.

## S2: Theoretical chemical shifts and geometries for verruculosin B (2).

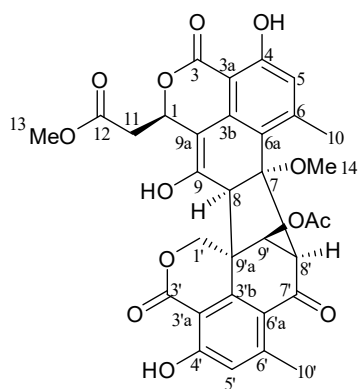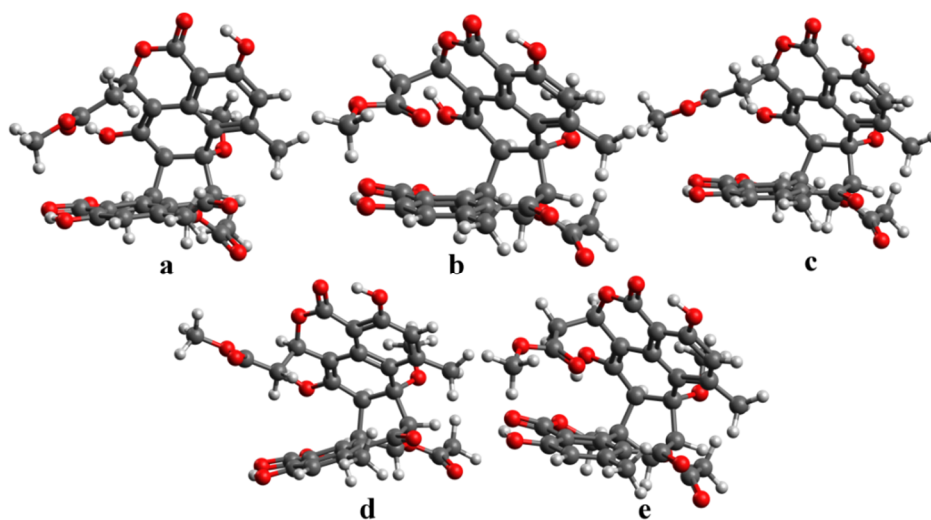

**Figure S1.** Optimized geometries of predominant conformers for verruculosin B (1*R*) at the B3LYP/6-31G(d) in the gas phase.

**Table S1.** Energies and Boltzmann distributions of the optimized verruculosin B (1*R*) at the B3LYP/6-31G(d) in the gas phase.

| Conformations                         | Relative Energy<br>(kcal/mol) | Boltzmann mole<br>fraction (%) |
|---------------------------------------|-------------------------------|--------------------------------|
| verruculosin B (1 <i>R</i> ) <b>a</b> | 0.02                          | 49.11                          |
| verruculosin B (1 <i>R</i> ) <b>b</b> | 7.83                          | 0.00                           |
| verruculosin B (1 <i>R</i> ) <b>c</b> | 0.00                          | 50.81                          |
| verruculosin B (1 <i>R</i> ) <b>d</b> | 5.42                          | 0.01                           |
| verruculosin B (1 <i>R</i> ) <b>e</b> | 3.89                          | 0.07                           |

**Table S2.** Optimized Z-matrixes of verruculosin B (1*R*) in the gas phase (Å) at B3LYP/6-31G(d) level.

| verruculosin B (1 <i>R</i> ) <b>a</b> |          |           |          | verruculosin B (1 <i>R</i> ) <b>b</b> |          |           |          |
|---------------------------------------|----------|-----------|----------|---------------------------------------|----------|-----------|----------|
| O                                     | 4.463761 | 8.998451  | 7.175555 | O                                     | 4.361119 | 9.274635  | 6.826813 |
| C                                     | 4.593182 | 10.335745 | 6.646875 | C                                     | 4.326090 | 10.698667 | 6.990492 |
| C                                     | 5.733827 | 11.100976 | 7.283856 | C                                     | 5.633205 | 11.338143 | 7.429855 |

|   |           |           |          |   |           |           |          |
|---|-----------|-----------|----------|---|-----------|-----------|----------|
| C | 6.930985  | 10.341060 | 7.644371 | C | 6.859982  | 10.541914 | 7.512540 |
| C | 6.856331  | 8.925707  | 7.522378 | C | 6.774236  | 9.184067  | 7.117632 |
| C | 5.579409  | 8.246631  | 7.314821 | C | 5.511617  | 8.573368  | 6.712642 |
| C | 8.103223  | 10.957776 | 8.117800 | C | 8.063313  | 11.066093 | 8.028437 |
| C | 9.238861  | 10.146416 | 8.402727 | C | 9.181693  | 10.196288 | 8.177246 |
| C | 9.171982  | 8.768262  | 8.214688 | C | 9.092408  | 8.876301  | 7.747413 |
| C | 7.995055  | 8.134850  | 7.811747 | C | 7.915449  | 8.351420  | 7.208911 |
| C | 5.659693  | 12.437099 | 7.492461 | C | 5.626531  | 12.622225 | 7.845562 |
| C | 6.772763  | 13.234785 | 8.102915 | C | 6.848912  | 13.379617 | 8.230816 |
| C | 8.092753  | 12.449454 | 8.464235 | C | 8.135798  | 12.519370 | 8.508692 |
| C | 7.229813  | 14.487666 | 7.238941 | C | 7.307712  | 14.519475 | 7.233124 |
| C | 7.356422  | 14.124369 | 5.768208 | C | 7.438667  | 14.010924 | 5.804112 |
| C | 8.415867  | 13.309527 | 5.323422 | C | 8.547934  | 13.250563 | 5.397299 |
| C | 9.438042  | 12.876448 | 6.310360 | C | 9.594194  | 12.945424 | 6.401831 |
| C | 9.210669  | 13.300382 | 7.769761 | C | 9.282526  | 13.369669 | 7.843886 |
| C | 8.657496  | 14.723714 | 7.756936 | C | 8.723844  | 14.792344 | 7.762784 |
| C | 6.407829  | 15.772896 | 7.410867 | C | 6.467158  | 15.798799 | 7.247096 |
| O | 5.245770  | 15.911801 | 6.576717 | O | 5.242978  | 15.734228 | 6.492662 |
| C | 5.273851  | 15.470497 | 5.318282 | C | 5.229176  | 15.103657 | 5.312534 |
| C | 6.387136  | 14.609581 | 4.879327 | C | 6.405403  | 14.321486 | 4.905569 |
| C | 6.462977  | 14.238956 | 3.511437 | C | 6.477067  | 13.828146 | 3.576778 |
| C | 7.515897  | 13.424380 | 3.073642 | C | 7.605812  | 13.107756 | 3.168369 |
| C | 8.496791  | 12.959050 | 3.940291 | C | 8.638609  | 12.803782 | 4.042454 |
| O | 5.438949  | 7.024606  | 7.333843 | O | 5.403401  | 7.406425  | 6.342806 |
| O | 4.358627  | 15.802352 | 4.564650 | O | 4.216127  | 15.194771 | 4.616956 |
| O | 10.438149 | 12.239380 | 6.008085 | O | 10.666075 | 12.423440 | 6.127836 |
| O | 7.988674  | 6.797311  | 7.744318 | O | 7.914773  | 7.065427  | 6.836756 |
| C | 10.555988 | 10.694540 | 8.908582 | C | 10.500945 | 10.621905 | 8.786825 |
| O | 5.554930  | 14.638168 | 2.613394 | O | 5.496723  | 14.022068 | 2.687070 |
| C | 9.599469  | 12.099296 | 3.375355 | C | 9.800250  | 11.993626 | 3.527236 |
| O | 8.561561  | 15.328329 | 9.059084 | O | 8.601412  | 15.437064 | 9.044627 |
| O | 8.360545  | 12.623586 | 9.874015 | O | 8.439470  | 12.583285 | 9.918047 |
| C | 4.671477  | 10.198566 | 5.107082 | C | 3.693436  | 11.268332 | 5.702977 |
| C | 3.995696  | 11.326284 | 4.361433 | C | 4.454949  | 10.921067 | 4.436079 |
| O | 3.884111  | 11.055441 | 3.063751 | O | 3.639113  | 11.010286 | 3.371809 |
| O | 3.569531  | 12.355655 | 4.870168 | O | 5.628355  | 10.621810 | 4.380855 |
| O | 4.588385  | 13.211386 | 7.216102 | O | 4.507456  | 13.399422 | 7.976940 |
| O | 10.789879 | 15.724042 | 9.040449 | O | 10.818530 | 15.896447 | 9.025209 |
| C | 9.724713  | 15.769962 | 9.611535 | C | 9.750783  | 15.925256 | 9.591169 |

|                      |           |           |           |                      |           |           |           |
|----------------------|-----------|-----------|-----------|----------------------|-----------|-----------|-----------|
| C                    | 9.483821  | 16.294162 | 11.004536 | C                    | 9.489079  | 16.473757 | 10.970960 |
| C                    | 7.503443  | 11.933450 | 10.773463 | C                    | 7.542094  | 11.906113 | 10.786182 |
| C                    | 3.239457  | 12.057175 | 2.240575  | C                    | 4.241123  | 10.763266 | 2.085313  |
| H                    | 3.640203  | 10.802326 | 6.907291  | H                    | 3.581033  | 10.843250 | 7.789644  |
| H                    | 10.031355 | 8.143352  | 8.434428  | H                    | 9.942919  | 8.209431  | 7.844872  |
| H                    | 6.391374  | 13.654036 | 9.042160  | H                    | 6.624834  | 13.902503 | 9.167141  |
| H                    | 10.158614 | 13.221583 | 8.294068  | H                    | 10.201887 | 13.309703 | 8.420936  |
| H                    | 9.236674  | 15.387936 | 7.109294  | H                    | 9.313587  | 15.435088 | 7.103621  |
| H                    | 7.051516  | 16.636776 | 7.204103  | H                    | 7.062407  | 16.625978 | 6.839782  |
| H                    | 6.035647  | 15.865318 | 8.430461  | H                    | 6.160903  | 16.059415 | 8.259530  |
| H                    | 7.547536  | 13.166198 | 2.019734  | H                    | 7.636162  | 12.758898 | 2.141363  |
| H                    | 7.053376  | 6.524383  | 7.553911  | H                    | 6.996381  | 6.859120  | 6.520372  |
| H                    | 11.103544 | 11.173479 | 8.089535  | H                    | 11.098986 | 11.174466 | 8.054060  |
| H                    | 10.411332 | 11.431680 | 9.700829  | H                    | 10.357864 | 11.260545 | 9.660009  |
| H                    | 11.176631 | 9.882218  | 9.296923  | H                    | 11.073688 | 9.740071  | 9.087918  |
| H                    | 4.878654  | 15.175444 | 3.118667  | H                    | 4.762208  | 14.494984 | 3.164411  |
| H                    | 9.663579  | 11.137187 | 3.891446  | H                    | 9.933565  | 11.078944 | 4.112396  |
| H                    | 9.431066  | 11.924669 | 2.308468  | H                    | 9.636528  | 11.724805 | 2.479625  |
| H                    | 10.577687 | 12.570481 | 3.509277  | H                    | 10.741250 | 12.544103 | 3.613907  |
| H                    | 5.710354  | 10.121443 | 4.765029  | H                    | 2.673406  | 10.883588 | 5.608739  |
| H                    | 4.175095  | 9.267247  | 4.812314  | H                    | 3.616015  | 12.361939 | 5.751657  |
| H                    | 4.051594  | 12.843316 | 6.472792  | H                    | 3.698894  | 12.878660 | 7.854844  |
| H                    | 8.670796  | 17.026650 | 11.007125 | H                    | 9.203291  | 15.651275 | 11.635737 |
| H                    | 9.181803  | 15.463964 | 11.652232 | H                    | 10.391754 | 16.955293 | 11.347947 |
| H                    | 10.399523 | 16.745698 | 11.387270 | H                    | 8.659129  | 17.186872 | 10.953242 |
| H                    | 6.446673  | 12.202337 | 10.631854 | H                    | 6.532728  | 12.342852 | 10.760580 |
| H                    | 7.602348  | 10.845034 | 10.686794 | H                    | 7.471192  | 10.837029 | 10.552515 |
| H                    | 7.810809  | 12.243245 | 11.775334 | H                    | 7.948465  | 12.027116 | 11.793298 |
| H                    | 2.259918  | 12.308536 | 2.652300  | H                    | 4.836021  | 9.847992  | 2.112182  |
| H                    | 3.864188  | 12.950609 | 2.188475  | H                    | 3.406806  | 10.663620 | 1.390613  |
| H                    | 3.141227  | 11.594401 | 1.259114  | H                    | 4.870488  | 11.611095 | 1.805332  |
| verruculosin B (1R)c |           |           |           | verruculosin B (1R)d |           |           |           |
| O                    | 4.889316  | 8.681745  | 6.896673  | O                    | 4.407061  | 9.414374  | 6.575063  |
| C                    | 4.799506  | 10.090147 | 6.605518  | C                    | 4.582576  | 10.828654 | 6.382339  |
| C                    | 5.882817  | 10.914913 | 7.271505  | C                    | 5.716839  | 11.420607 | 7.189011  |
| C                    | 7.172263  | 10.274965 | 7.539646  | C                    | 6.868660  | 10.572217 | 7.492693  |
| C                    | 7.272720  | 8.882989  | 7.263511  | C                    | 6.748076  | 9.192385  | 7.177233  |
| C                    | 6.097692  | 8.079486  | 6.937268  | C                    | 5.484617  | 8.609838  | 6.725466  |
| C                    | 8.264260  | 10.971869 | 8.094433  | C                    | 8.028191  | 11.074548 | 8.110630  |

|   |           |           |           |   |           |           |           |
|---|-----------|-----------|-----------|---|-----------|-----------|-----------|
| C | 9.472922  | 10.265099 | 8.355177  | C | 9.094233  | 10.174220 | 8.399388  |
| C | 9.573283  | 8.916753  | 8.024747  | C | 8.979411  | 8.831984  | 8.050265  |
| C | 8.495019  | 8.204636  | 7.497641  | C | 7.825069  | 8.315383  | 7.457080  |
| C | 5.669370  | 12.214999 | 7.589712  | C | 5.696820  | 12.722196 | 7.545414  |
| C | 6.736609  | 13.107133 | 8.136821  | C | 6.855020  | 13.436479 | 8.158550  |
| C | 8.107892  | 12.436033 | 8.514193  | C | 8.094283  | 12.540632 | 8.551843  |
| C | 7.095631  | 14.342979 | 7.206616  | C | 7.441450  | 14.622572 | 7.280475  |
| C | 7.332352  | 13.909809 | 5.766325  | C | 7.633680  | 14.192844 | 5.834094  |
| C | 8.500544  | 13.211169 | 5.408550  | C | 8.693070  | 13.342527 | 5.468970  |
| C | 9.539129  | 12.992221 | 6.447278  | C | 9.647001  | 12.911993 | 6.521656  |
| C | 9.166800  | 13.404622 | 7.877353  | C | 9.311083  | 13.337550 | 7.959467  |
| C | 8.458136  | 14.755045 | 7.787000  | C | 8.837135  | 14.788039 | 7.900230  |
| C | 6.129920  | 15.534771 | 7.261642  | C | 6.687671  | 15.956603 | 7.341736  |
| O | 5.002766  | 15.491548 | 6.367870  | O | 5.553640  | 16.083014 | 6.468060  |
| C | 5.138182  | 14.982370 | 5.144138  | C | 5.594052  | 15.547507 | 5.243744  |
| C | 6.352361  | 14.220550 | 4.808980  | C | 6.708022  | 14.653812 | 4.884989  |
| C | 6.535237  | 13.786073 | 3.467943  | C | 6.829799  | 14.219811 | 3.536984  |
| C | 7.688292  | 13.065758 | 3.127166  | C | 7.895315  | 13.381137 | 3.177698  |
| C | 8.678055  | 12.778917 | 4.057328  | C | 8.830500  | 12.939445 | 4.103193  |
| O | 6.121827  | 6.859996  | 6.773547  | O | 5.314030  | 7.407257  | 6.540840  |
| O | 4.227197  | 15.168752 | 4.333329  | O | 4.684490  | 15.821052 | 4.460706  |
| O | 10.652210 | 12.548007 | 6.202103  | O | 10.668274 | 12.279108 | 6.291660  |
| O | 8.656983  | 6.895215  | 7.270566  | O | 7.781184  | 7.002064  | 7.206346  |
| C | 10.696629 | 10.895947 | 8.985716  | C | 10.385835 | 10.589660 | 9.070469  |
| O | 5.643848  | 14.037068 | 2.505375  | O | 5.962606  | 14.574697 | 2.588115  |
| C | 9.893490  | 12.015437 | 3.595125  | C | 9.942449  | 12.040792 | 3.624206  |
| O | 8.220717  | 15.367874 | 9.067722  | O | 8.674814  | 15.399463 | 9.193112  |
| O | 8.318947  | 12.582124 | 9.934912  | O | 8.286953  | 12.630454 | 9.978590  |
| C | 4.740142  | 10.234180 | 5.063711  | C | 4.744410  | 11.102910 | 4.872554  |
| C | 3.747056  | 11.280015 | 4.604213  | C | 3.615995  | 10.522063 | 4.037169  |
| O | 3.623331  | 11.300137 | 3.280598  | O | 2.414310  | 10.931075 | 4.505687  |
| O | 3.104376  | 12.010872 | 5.347543  | O | 3.758917  | 9.810551  | 3.071328  |
| O | 4.504782  | 12.886775 | 7.469155  | O | 4.640484  | 13.565474 | 7.364550  |
| O | 10.378460 | 16.048528 | 9.143509  | O | 10.911839 | 15.721916 | 9.319194  |
| C | 9.290558  | 15.964568 | 9.664399  | C | 9.814572  | 15.806851 | 9.819577  |
| C | 8.917293  | 16.472591 | 11.033834 | C | 9.500311  | 16.349605 | 11.190594 |
| C | 7.489288  | 11.794751 | 10.778621 | C | 7.326227  | 11.966830 | 10.788910 |
| C | 2.684287  | 12.258282 | 2.736450  | C | 1.271613  | 10.420068 | 3.794281  |
| H | 3.822080  | 10.365747 | 7.009132  | H | 3.613817  | 11.229383 | 6.699814  |

|                      |           |           |           |   |           |           |           |
|----------------------|-----------|-----------|-----------|---|-----------|-----------|-----------|
| H                    | 10.491513 | 8.371890  | 8.218052  | H | 9.785600  | 8.139222  | 8.268399  |
| H                    | 6.347391  | 13.553577 | 9.059111  | H | 6.506768  | 13.908089 | 9.084725  |
| H                    | 10.078007 | 13.445977 | 8.467865  | H | 10.202663 | 13.209607 | 8.567360  |
| H                    | 8.994478  | 15.466931 | 7.153406  | H | 9.497269  | 15.417349 | 7.297104  |
| H                    | 6.681863  | 16.453535 | 7.028040  | H | 7.382001  | 16.768207 | 7.090631  |
| H                    | 5.695333  | 15.640481 | 8.254472  | H | 6.296384  | 16.140467 | 8.341716  |
| H                    | 7.791708  | 12.744327 | 2.095653  | H | 7.962476  | 13.075253 | 2.138562  |
| H                    | 7.769972  | 6.538762  | 7.000744  | H | 6.868091  | 6.802658  | 6.870758  |
| H                    | 11.254355 | 11.471418 | 8.238611  | H | 11.044710 | 11.077705 | 8.343714  |
| H                    | 10.431991 | 11.565915 | 9.805483  | H | 10.212996 | 11.283420 | 9.894974  |
| H                    | 11.361100 | 10.117310 | 9.370926  | H | 10.907644 | 9.709384  | 9.456168  |
| H                    | 4.904503  | 14.550997 | 2.933117  | H | 5.261051  | 15.127399 | 3.028903  |
| H                    | 10.068227 | 11.128157 | 4.210108  | H | 9.967764  | 11.101340 | 4.183787  |
| H                    | 9.771811  | 11.710760 | 2.551387  | H | 9.816374  | 11.820632 | 2.560205  |
| H                    | 10.799602 | 12.621446 | 3.686026  | H | 10.921155 | 12.504137 | 3.779591  |
| H                    | 5.722982  | 10.464103 | 4.637166  | H | 4.770926  | 12.188224 | 4.716445  |
| H                    | 4.424066  | 9.277280  | 4.632190  | H | 5.686430  | 10.687783 | 4.506765  |
| H                    | 3.872417  | 12.463903 | 6.839610  | H | 3.863952  | 13.093641 | 7.023109  |
| H                    | 8.019791  | 17.096722 | 10.983592 | H | 9.115646  | 15.539336 | 11.819371 |
| H                    | 8.690048  | 15.619921 | 11.682910 | H | 10.406551 | 16.762296 | 11.634650 |
| H                    | 9.749205  | 17.041266 | 11.450226 | H | 8.723912  | 17.118754 | 11.132776 |
| H                    | 6.422292  | 12.021945 | 10.641146 | H | 6.308722  | 12.351011 | 10.625576 |
| H                    | 7.643421  | 10.720637 | 10.621689 | H | 7.324071  | 10.883147 | 10.622500 |
| H                    | 7.772415  | 12.052549 | 11.802051 | H | 7.614287  | 12.171110 | 11.822905 |
| H                    | 1.663035  | 11.925506 | 2.937945  | H | 1.258422  | 9.328202  | 3.833784  |
| H                    | 2.845150  | 13.239897 | 3.182811  | H | 0.400955  | 10.835117 | 4.302366  |
| H                    | 2.881074  | 12.272068 | 1.665394  | H | 1.298528  | 10.741244 | 2.750060  |
| verruculosin B (1R)e |           |           |           |   |           |           |           |
| O                    | 4.388256  | 9.178686  | 6.828411  |   |           |           |           |
| C                    | 4.320694  | 10.609823 | 6.998427  |   |           |           |           |
| C                    | 5.626046  | 11.272153 | 7.410300  |   |           |           |           |
| C                    | 6.856208  | 10.489728 | 7.529210  |   |           |           |           |
| C                    | 6.793580  | 9.125998  | 7.154885  |   |           |           |           |
| C                    | 5.541039  | 8.493986  | 6.741103  |   |           |           |           |
| C                    | 8.049512  | 11.039983 | 8.041645  |   |           |           |           |
| C                    | 9.179720  | 10.189979 | 8.212482  |   |           |           |           |
| C                    | 9.110825  | 8.861460  | 7.806557  |   |           |           |           |
| C                    | 7.944893  | 8.311216  | 7.267988  |   |           |           |           |
| C                    | 5.594621  | 12.573883 | 7.759353  |   |           |           |           |



|   |           |           |           |  |  |  |  |
|---|-----------|-----------|-----------|--|--|--|--|
| C | 6.800137  | 13.348413 | 8.191094  |  |  |  |  |
| C | 8.097845  | 12.500442 | 8.495690  |  |  |  |  |
| C | 7.283693  | 14.508484 | 7.228177  |  |  |  |  |
| C | 7.408165  | 14.028136 | 5.789880  |  |  |  |  |
| C | 8.508766  | 13.266533 | 5.374075  |  |  |  |  |
| C | 9.547708  | 12.930910 | 6.381266  |  |  |  |  |
| C | 9.245308  | 13.347166 | 7.829182  |  |  |  |  |
| C | 8.696392  | 14.773303 | 7.763880  |  |  |  |  |
| C | 6.438142  | 15.775666 | 7.253634  |  |  |  |  |
| O | 5.160629  | 15.599379 | 6.595824  |  |  |  |  |
| C | 5.182457  | 15.093507 | 5.326151  |  |  |  |  |
| C | 6.377045  | 14.368244 | 4.892989  |  |  |  |  |
| C | 6.453937  | 13.908212 | 3.551600  |  |  |  |  |
| C | 7.578744  | 13.186935 | 3.134725  |  |  |  |  |
| C | 8.600898  | 12.848079 | 4.008860  |  |  |  |  |
| O | 5.462627  | 7.319216  | 6.381597  |  |  |  |  |
| O | 4.177406  | 15.239451 | 4.641120  |  |  |  |  |
| O | 10.608776 | 12.392616 | 6.101146  |  |  |  |  |
| O | 7.964533  | 7.020351  | 6.915094  |  |  |  |  |
| C | 10.491481 | 10.642741 | 8.820181  |  |  |  |  |
| O | 5.484223  | 14.130967 | 2.657991  |  |  |  |  |
| C | 9.754030  | 12.033971 | 3.483127  |  |  |  |  |
| O | 8.568142  | 15.406957 | 9.049711  |  |  |  |  |
| O | 8.384732  | 12.595751 | 9.906697  |  |  |  |  |
| C | 3.656109  | 11.154942 | 5.723248  |  |  |  |  |
| C | 4.439089  | 10.889989 | 4.453788  |  |  |  |  |
| O | 3.623558  | 10.951799 | 3.383120  |  |  |  |  |
| O | 5.630606  | 10.668936 | 4.388238  |  |  |  |  |
| O | 4.375888  | 13.201284 | 7.826652  |  |  |  |  |
| O | 10.790394 | 15.839236 | 9.054740  |  |  |  |  |
| C | 9.719352  | 15.873187 | 9.613619  |  |  |  |  |
| C | 9.452826  | 16.403511 | 10.999146 |  |  |  |  |
| C | 7.501563  | 11.899698 | 10.776379 |  |  |  |  |
| C | 4.245334  | 10.758850 | 2.099048  |  |  |  |  |
| H | 3.595699  | 10.753314 | 7.807050  |  |  |  |  |
| H | 9.969600  | 8.207974  | 7.921479  |  |  |  |  |
| H | 6.546418  | 13.848298 | 9.134582  |  |  |  |  |
| H | 10.168330 | 13.277047 | 8.398467  |  |  |  |  |
| H | 9.290642  | 15.420492 | 7.112788  |  |  |  |  |

|   |           |           |           |  |  |  |  |
|---|-----------|-----------|-----------|--|--|--|--|
| H | 6.966669  | 16.596004 | 6.754233  |  |  |  |  |
| H | 6.196718  | 16.084927 | 8.270572  |  |  |  |  |
| H | 7.611692  | 12.860848 | 2.100482  |  |  |  |  |
| H | 7.049345  | 6.800859  | 6.593094  |  |  |  |  |
| H | 11.091831 | 11.178585 | 8.076970  |  |  |  |  |
| H | 10.338837 | 11.302670 | 9.675860  |  |  |  |  |
| H | 11.068401 | 9.773604  | 9.148989  |  |  |  |  |
| H | 4.740174  | 14.584473 | 3.130352  |  |  |  |  |
| H | 9.865343  | 11.102208 | 4.045563  |  |  |  |  |
| H | 9.596945  | 11.795975 | 2.427288  |  |  |  |  |
| H | 10.702795 | 12.566294 | 3.595087  |  |  |  |  |
| H | 2.666006  | 10.700419 | 5.621465  |  |  |  |  |
| H | 3.499109  | 12.233422 | 5.823419  |  |  |  |  |
| H | 4.464752  | 14.156517 | 7.650309  |  |  |  |  |
| H | 9.156402  | 15.572974 | 11.649081 |  |  |  |  |
| H | 10.356668 | 16.872101 | 11.389332 |  |  |  |  |
| H | 8.628636  | 17.123420 | 10.987293 |  |  |  |  |
| H | 6.472406  | 12.282716 | 10.715200 |  |  |  |  |
| H | 7.489483  | 10.822408 | 10.573877 |  |  |  |  |
| H | 7.879211  | 12.071527 | 11.787251 |  |  |  |  |
| H | 3.422737  | 10.629835 | 1.394959  |  |  |  |  |
| H | 4.835715  | 11.639755 | 1.834272  |  |  |  |  |
| H | 4.886025  | 9.874483  | 2.112940  |  |  |  |  |

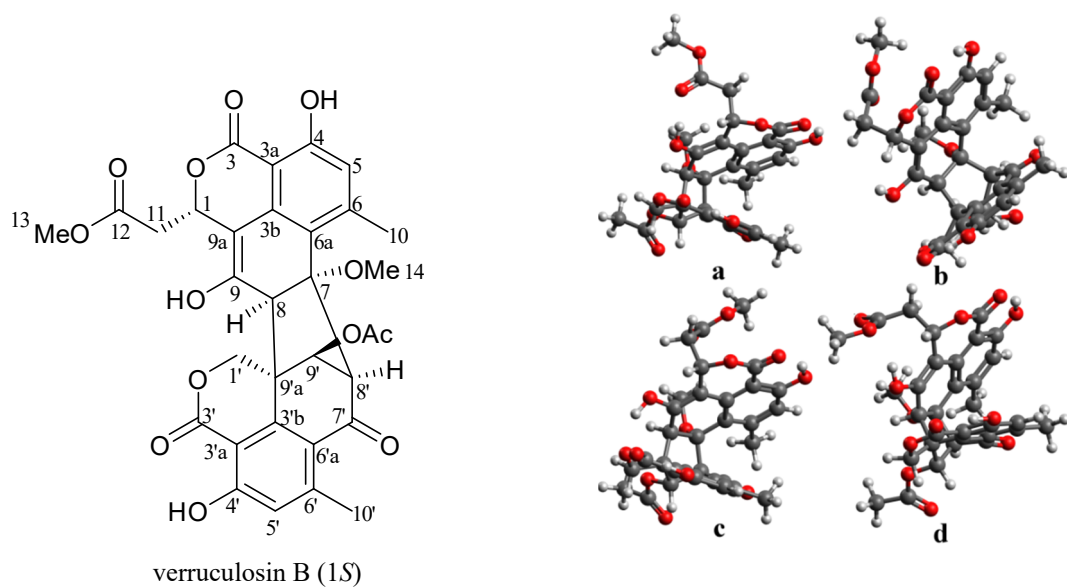

**Figure S2.** Optimized geometries of predominant conformers for verruculosin B (1S) at the B3LYP/6-31G(d) in the gas phase.

**Table S3.** Energies and Boltzmann distributions of the optimized verruculosin B (1S) at the B3LYP/6-31G(d) in the gas phase.

| Conformations        | Relative Energy<br>(kcal/mol) | Boltzmann mole fraction<br>(%) |
|----------------------|-------------------------------|--------------------------------|
| verruculosin B (1S)a | 0.00                          | 99.29                          |
| verruculosin B (1S)b | 6.97                          | 0.00                           |
| verruculosin B (1S)c | 3.09                          | 0.53                           |
| verruculosin B (1S)d | 3.74                          | 0.18                           |

**Table S4.** Optimized Z-matrixes of verruculosin B (1S) in the gas phase (Å) at B3LYP/6-31G(d) level.

| verruculosin B (1S)a |           |           |           | verruculosin B (1S)b |           |           |           |
|----------------------|-----------|-----------|-----------|----------------------|-----------|-----------|-----------|
| O                    | -2.693337 | 17.849679 | 12.248024 | O                    | -2.979382 | 18.011770 | 12.533456 |
| C                    | -2.879998 | 19.272469 | 12.424337 | C                    | -3.374109 | 19.382240 | 12.371100 |
| C                    | -2.205946 | 20.067219 | 11.328909 | C                    | -2.613089 | 20.109764 | 11.285688 |
| C                    | -0.896536 | 19.590479 | 10.884951 | C                    | -1.217935 | 19.733854 | 11.058706 |
| C                    | -0.499223 | 18.301152 | 11.328961 | C                    | -0.770782 | 18.534988 | 11.670262 |
| C                    | -1.451837 | 17.391544 | 11.962607 | C                    | -1.690500 | 17.635680 | 12.365742 |
| C                    | -0.039111 | 20.366378 | 10.081723 | C                    | -0.339349 | 20.531332 | 10.303777 |
| C                    | 1.288739  | 19.907473 | 9.858463  | C                    | 1.037496  | 20.174735 | 10.260323 |
| C                    | 1.686749  | 18.666114 | 10.351755 | C                    | 1.471461  | 19.009475 | 10.889414 |
| C                    | 0.802031  | 17.826739 | 11.032340 | C                    | 0.590062  | 18.158230 | 11.559237 |
| C                    | -2.739329 | 21.205017 | 10.822336 | C                    | -3.155777 | 21.168567 | 10.650551 |
| C                    | -2.075883 | 21.978405 | 9.728596  | C                    | -2.420095 | 22.001210 | 9.656983  |
| C                    | -0.553893 | 21.668921 | 9.463352  | C                    | -0.860400 | 21.778972 | 9.582082  |
| C                    | -2.776922 | 21.924885 | 8.313970  | C                    | -2.941810 | 21.920846 | 8.166268  |
| C                    | -3.026060 | 20.492612 | 7.861972  | C                    | -3.090305 | 20.477832 | 7.708199  |
| C                    | -1.979481 | 19.695632 | 7.363602  | C                    | -1.965301 | 19.706084 | 7.368014  |
| C                    | -0.626046 | 20.293642 | 7.265927  | C                    | -0.627068 | 20.344381 | 7.436869  |
| C                    | -0.460958 | 21.687263 | 7.890330  | C                    | -0.583589 | 21.760081 | 8.032120  |
| C                    | -1.665052 | 22.511461 | 7.430832  | C                    | -1.749525 | 22.531998 | 7.414107  |
| C                    | -4.063769 | 22.743517 | 8.177981  | C                    | -4.222494 | 22.701854 | 7.858431  |
| O                    | -5.248209 | 22.115181 | 8.694232  | O                    | -5.449695 | 22.043691 | 8.217609  |
| C                    | -5.445445 | 20.807296 | 8.483996  | C                    | -5.576803 | 20.726750 | 8.012618  |
| C                    | -4.332212 | 19.990611 | 7.973405  | C                    | -4.385930 | 19.938473 | 7.658267  |
| C                    | -4.586121 | 18.641087 | 7.608863  | C                    | -4.551940 | 18.576479 | 7.289122  |
| C                    | -3.539664 | 17.857417 | 7.100252  | C                    | -3.426397 | 17.818202 | 6.935248  |
| C                    | -2.250410 | 18.349894 | 6.962423  | C                    | -2.143913 | 18.347126 | 6.958779  |
| O                    | -1.213307 | 16.210204 | 12.206768 | O                    | -1.376231 | 16.520859 | 12.774426 |

|   |           |           |           |   |           |           |           |
|---|-----------|-----------|-----------|---|-----------|-----------|-----------|
| O | -6.555186 | 20.339909 | 8.734829  | O | -6.693278 | 20.225536 | 8.144255  |
| O | 0.316828  | 19.755408 | 6.701571  | O | 0.397359  | 19.816634 | 7.026243  |
| O | 1.226717  | 16.605869 | 11.384881 | O | 1.075462  | 17.024947 | 12.083944 |
| C | 2.319346  | 20.692981 | 9.076194  | C | 2.090147  | 20.991528 | 9.542081  |
| O | -5.790037 | 18.080862 | 7.726455  | O | -5.744451 | 17.980419 | 7.261286  |
| C | -1.186658 | 17.432783 | 6.413459  | C | -0.993289 | 17.454475 | 6.568397  |
| O | -1.550667 | 23.914569 | 7.736284  | O | -1.723825 | 23.941939 | 7.703504  |
| O | 0.233491  | 22.805096 | 9.872500  | O | -0.197277 | 22.968137 | 10.042742 |
| C | -2.418077 | 19.604228 | 13.859401 | C | -3.350656 | 20.102404 | 13.748198 |
| C | -3.064613 | 20.840922 | 14.437054 | C | -1.963401 | 20.444001 | 14.260627 |
| O | -2.574627 | 21.136238 | 15.642879 | O | -1.404720 | 19.394165 | 14.891875 |
| O | -3.956479 | 21.489060 | 13.907656 | O | -1.419255 | 21.518328 | 14.115504 |
| O | -3.885564 | 21.791251 | 11.226191 | O | -4.410307 | 21.658726 | 10.868708 |
| O | -0.211844 | 24.201644 | 5.932635  | O | -0.147290 | 24.242721 | 6.106878  |
| C | -0.758500 | 24.654651 | 6.911150  | C | -0.837034 | 24.693294 | 6.991613  |
| C | -0.666737 | 26.077455 | 7.402764  | C | -0.843130 | 26.120330 | 7.477637  |
| C | 0.316376  | 23.030832 | 11.271082 | C | -0.287551 | 23.232111 | 11.440785 |
| C | -3.162956 | 22.273132 | 16.310715 | C | -0.059625 | 19.593191 | 15.367003 |
| H | -3.963919 | 19.396831 | 12.368021 | H | -4.432644 | 19.289718 | 12.095362 |
| H | 2.693878  | 18.303779 | 10.172158 | H | 2.517469  | 18.723231 | 10.847670 |
| H | -2.119487 | 23.032663 | 10.021477 | H | -2.560960 | 23.047017 | 9.952820  |
| H | 0.488981  | 22.099066 | 7.557387  | H | 0.384040  | 22.197499 | 7.799589  |
| H | -1.862463 | 22.402059 | 6.361124  | H | -1.811778 | 22.397361 | 6.330773  |
| H | -4.240413 | 22.960806 | 7.116459  | H | -4.265206 | 22.910706 | 6.781876  |
| H | -3.987647 | 23.687934 | 8.715358  | H | -4.243238 | 23.650518 | 8.393507  |
| H | -3.770165 | 16.833187 | 6.825086  | H | -3.589808 | 16.783915 | 6.649876  |
| H | 0.447376  | 16.132822 | 11.776459 | H | 0.302198  | 16.531371 | 12.463522 |
| H | 2.192912  | 20.506171 | 8.003498  | H | 2.095598  | 20.737494 | 8.475905  |
| H | 2.233037  | 21.767030 | 9.246265  | H | 1.910533  | 22.063224 | 9.637208  |
| H | 3.327061  | 20.369772 | 9.353668  | H | 3.081319  | 20.761896 | 9.944104  |
| H | -6.385635 | 18.760319 | 8.145108  | H | -6.408925 | 18.645629 | 7.587499  |
| H | -1.603590 | 16.436872 | 6.237479  | H | -0.242518 | 17.400606 | 7.362174  |
| H | -0.773997 | 17.818201 | 5.476652  | H | -1.356901 | 16.446013 | 6.350860  |
| H | -0.339019 | 17.348693 | 7.099853  | H | -0.469409 | 17.842791 | 5.690195  |
| H | -2.686177 | 18.764431 | 14.513560 | H | -3.892233 | 21.047521 | 13.645266 |
| H | -1.328738 | 19.704510 | 13.915716 | H | -3.870342 | 19.464381 | 14.469111 |
| H | -4.115993 | 21.538051 | 12.149707 | H | -4.934895 | 21.060761 | 11.424093 |

|                      |           |           |           |                      |           |           |           |
|----------------------|-----------|-----------|-----------|----------------------|-----------|-----------|-----------|
| H                    | -1.665568 | 26.499727 | 7.550607  | H                    | -1.862166 | 26.518835 | 7.496314  |
| H                    | -0.155943 | 26.092200 | 8.371656  | H                    | -0.458226 | 26.150675 | 8.502811  |
| H                    | -0.108430 | 26.675667 | 6.682158  | H                    | -0.212265 | 26.728324 | 6.828683  |
| H                    | -0.665314 | 23.259816 | 11.711786 | H                    | -1.324006 | 23.388207 | 11.768234 |
| H                    | 0.750033  | 22.172777 | 11.800233 | H                    | 0.141559  | 22.425416 | 12.043883 |
| H                    | 0.967970  | 23.898530 | 11.400456 | H                    | 0.278176  | 24.152052 | 11.606412 |
| H                    | -3.028308 | 23.176368 | 15.711331 | H                    | 0.611007  | 19.795498 | 14.528087 |
| H                    | -4.229413 | 22.104363 | 16.476420 | H                    | -0.024369 | 20.430111 | 16.068661 |
| H                    | -2.632265 | 22.354240 | 17.258619 | H                    | 0.213415  | 18.660968 | 15.860516 |
| verruculosin B (1S)c |           |           |           | verruculosin B (1S)d |           |           |           |
| O                    | -2.904636 | 17.936335 | 12.561008 | O                    | -2.604326 | 17.717460 | 12.379707 |
| C                    | -3.346571 | 19.297283 | 12.375311 | C                    | -2.831482 | 19.135266 | 12.505990 |
| C                    | -2.577626 | 20.037663 | 11.308238 | C                    | -2.195884 | 19.925669 | 11.385486 |
| C                    | -1.178003 | 19.693977 | 11.087322 | C                    | -0.878505 | 19.479949 | 10.931656 |
| C                    | -0.706587 | 18.508893 | 11.704802 | C                    | -0.455533 | 18.194902 | 11.361456 |
| C                    | -1.611670 | 17.594507 | 12.407202 | C                    | -1.369200 | 17.276692 | 12.039236 |
| C                    | -0.319589 | 20.503395 | 10.321457 | C                    | -0.043693 | 20.284539 | 10.136494 |
| C                    | 1.062689  | 20.171227 | 10.268627 | C                    | 1.288581  | 19.848979 | 9.888177  |
| C                    | 1.520895  | 19.018535 | 10.903297 | C                    | 1.707305  | 18.603644 | 10.351222 |
| C                    | 0.659573  | 18.157034 | 11.588153 | C                    | 0.847912  | 17.744064 | 11.039730 |
| C                    | -3.162651 | 21.072085 | 10.674267 | C                    | -2.748597 | 21.061674 | 10.904908 |
| C                    | -2.438950 | 21.943656 | 9.694010  | C                    | -2.095916 | 21.899824 | 9.856340  |
| C                    | -0.869122 | 21.740824 | 9.606886  | C                    | -0.572017 | 21.606959 | 9.573143  |
| C                    | -2.948962 | 21.903216 | 8.197779  | C                    | -2.800215 | 21.927016 | 8.442182  |
| C                    | -3.116927 | 20.471444 | 7.713796  | C                    | -3.067894 | 20.521040 | 7.925739  |
| C                    | -2.003355 | 19.700372 | 7.349830  | C                    | -2.030085 | 19.733962 | 7.395822  |
| C                    | -0.656177 | 20.324646 | 7.442338  | C                    | -0.668702 | 20.319841 | 7.325222  |
| C                    | -0.600139 | 21.733261 | 8.055733  | C                    | -0.486861 | 21.687273 | 8.002547  |
| C                    | -1.761072 | 22.522079 | 7.449581  | C                    | -1.683849 | 22.541496 | 7.583726  |
| C                    | -4.232883 | 22.677199 | 7.926177  | C                    | -4.075310 | 22.768463 | 8.345046  |
| O                    | -5.400676 | 22.014886 | 8.466366  | O                    | -5.269062 | 22.133460 | 8.832643  |
| C                    | -5.589340 | 20.709278 | 8.102918  | C                    | -5.482320 | 20.838040 | 8.564545  |
| C                    | -4.421963 | 19.944778 | 7.657781  | C                    | -4.380846 | 20.031659 | 8.014809  |
| C                    | -4.604062 | 18.599089 | 7.238444  | C                    | -4.650835 | 18.702190 | 7.592367  |
| C                    | -3.487436 | 17.843918 | 6.852792  | C                    | -3.613474 | 17.928982 | 7.050481  |
| C                    | -2.198447 | 18.356595 | 6.896343  | C                    | -2.317558 | 18.410649 | 6.935410  |
| O                    | -1.262929 | 16.491435 | 12.825705 | O                    | -1.103200 | 16.101875 | 12.282837 |

|   |           |           |           |   |           |           |           |
|---|-----------|-----------|-----------|---|-----------|-----------|-----------|
| O | -6.715898 | 20.245962 | 8.216865  | O | -6.596471 | 20.373506 | 8.801351  |
| O | 0.363353  | 19.788975 | 7.032963  | O | 0.268802  | 19.790397 | 6.744352  |
| O | 1.168409  | 17.037280 | 12.118436 | O | 1.301140  | 16.530009 | 11.377191 |
| C | 2.096535  | 20.999790 | 9.535700  | C | 2.302003  | 20.666751 | 9.117053  |
| O | -5.801098 | 18.012781 | 7.195929  | O | -5.861283 | 18.151293 | 7.686378  |
| C | -1.058447 | 17.464489 | 6.477001  | C | -1.265250 | 17.506094 | 6.345738  |
| O | -1.733702 | 23.927224 | 7.756951  | O | -1.556601 | 23.927949 | 7.951118  |
| O | -0.226151 | 22.941801 | 10.064677 | O | 0.206749  | 22.728458 | 10.029195 |
| C | -3.375668 | 20.023377 | 13.746726 | C | -2.348859 | 19.554092 | 13.915979 |
| C | -2.011703 | 20.421355 | 14.273529 | C | -2.725731 | 20.966548 | 14.311183 |
| O | -1.429455 | 19.408463 | 14.947637 | O | -4.060434 | 21.192621 | 14.115848 |
| O | -1.489228 | 21.503940 | 14.103111 | O | -1.978060 | 21.801704 | 14.758689 |
| O | -4.431598 | 21.424738 | 11.041785 | O | -3.915370 | 21.616062 | 11.326811 |
| O | -0.144340 | 24.238683 | 6.175627  | O | -0.206320 | 24.276434 | 6.167311  |
| C | -0.834746 | 24.682699 | 7.062807  | C | -0.749154 | 24.693460 | 7.163674  |
| C | -0.830310 | 26.101243 | 7.571780  | C | -0.634147 | 26.089074 | 7.722603  |
| C | -0.292925 | 23.190123 | 11.468282 | C | 0.320476  | 22.874460 | 11.439655 |
| C | -0.101277 | 19.666735 | 15.436774 | C | -4.531181 | 22.499369 | 14.519454 |
| H | -4.387677 | 19.196414 | 12.062789 | H | -3.920743 | 19.214800 | 12.468636 |
| H | 2.571505  | 18.750287 | 10.856259 | H | 2.716972  | 18.258067 | 10.153874 |
| H | -2.579647 | 22.981200 | 10.022340 | H | -2.137906 | 22.935095 | 10.212142 |
| H | 0.370242  | 22.163825 | 7.822948  | H | 0.464722  | 22.102581 | 7.679872  |
| H | -1.826453 | 22.401293 | 6.364548  | H | -1.884702 | 22.480649 | 6.510722  |
| H | -4.381880 | 22.801340 | 6.847248  | H | -4.249059 | 23.036567 | 7.294913  |
| H | -4.219898 | 23.662465 | 8.391610  | H | -3.986070 | 23.686977 | 8.924034  |
| H | -3.661893 | 16.821887 | 6.532408  | H | -3.856360 | 16.920848 | 6.730263  |
| H | 0.403179  | 16.537922 | 12.510843 | H | 0.543328  | 16.044650 | 11.794559 |
| H | 2.098498  | 20.740235 | 8.470815  | H | 2.167245  | 20.509224 | 8.040777  |
| H | 1.902975  | 22.069624 | 9.627036  | H | 2.206084  | 21.734404 | 9.319662  |
| H | 3.094597  | 20.787930 | 9.930347  | H | 3.315953  | 20.347725 | 9.375572  |
| H | -6.463068 | 18.653693 | 7.560161  | H | -6.449197 | 18.817473 | 8.134861  |
| H | -0.315361 | 17.367482 | 7.273928  | H | -0.418611 | 17.380908 | 7.027000  |
| H | -1.434209 | 16.471468 | 6.214715  | H | -1.694149 | 16.524507 | 6.124289  |
| H | -0.521640 | 17.882547 | 5.620496  | H | -0.847664 | 17.929384 | 5.427585  |
| H | -3.960734 | 20.937102 | 13.618491 | H | -2.794912 | 18.862348 | 14.641322 |
| H | -3.877421 | 19.365530 | 14.462320 | H | -1.261794 | 19.473894 | 13.985876 |
| H | -4.891093 | 21.881232 | 10.311628 | H | -4.236100 | 21.195639 | 12.146379 |

|   |           |           |           |   |           |           |           |
|---|-----------|-----------|-----------|---|-----------|-----------|-----------|
| H | -0.443566 | 26.111113 | 8.596666  | H | -0.115108 | 26.048476 | 8.686399  |
| H | -0.195415 | 26.715012 | 6.932307  | H | -0.072557 | 26.713798 | 7.027520  |
| H | -1.846072 | 26.507545 | 7.598542  | H | -1.625472 | 26.517543 | 7.899762  |
| H | -1.325941 | 23.293432 | 11.824661 | H | -0.657159 | 22.996341 | 11.927397 |
| H | 0.187806  | 22.398700 | 12.051774 | H | 0.836181  | 22.023365 | 11.900301 |
| H | 0.234855  | 24.133541 | 11.626879 | H | 0.908492  | 23.780857 | 11.601865 |
| H | 0.195381  | 18.759874 | 15.963281 | H | -5.608970 | 22.480686 | 14.359326 |
| H | 0.577558  | 19.866680 | 14.603606 | H | -4.297149 | 22.671455 | 15.571566 |
| H | -0.103983 | 20.525372 | 16.112924 | H | -4.061974 | 23.273969 | 13.908751 |

**Table S5.** Comparison of the Calculated vs. Experimental Carbon Resonances for verruculosin B.

| No. | $\delta_{\text{expt.}}$ | $\delta_{\text{calcd. (R)}}$ | $\delta_{\text{calcd. (S)}}$ |
|-----|-------------------------|------------------------------|------------------------------|
| 1   | 70.63                   | 72.9639                      | 75.0399                      |
| 3   | 167.92                  | 162.2459                     | 162.4392                     |
| 3a  | 100.00                  | 99.2039                      | 99.3296                      |
| 3b  | 134.09                  | 132.0977                     | 131.2185                     |
| 4   | 161.71                  | 158.7556                     | 158.2182                     |
| 5   | 118.01                  | 114.4351                     | 113.9516                     |
| 6   | 149.52                  | 146.8688                     | 146.6661                     |
| 6a  | 118.44                  | 111.463                      | 112.1541                     |
| 7   | 86.35                   | 89.3373                      | 89.4974                      |
| 8   | 57.80                   | 60.7735                      | 61.0655                      |
| 9   | 150.86                  | 145.4432                     | 143.3249                     |
| 9a  | 103.93                  | 106.1772                     | 105.6258                     |
| 10  | 21.36                   | 23.7548                      | 22.8485                      |
| 11  | 39.65                   | 41.4338                      | 41.129                       |
| 12  | 172.99                  | 166.9078                     | 163.8276                     |
| 13  | 52.93                   | 51.6018                      | 50.7588                      |
| 14  | 50.78                   | 48.816                       | 50.9347                      |
| 1'  | 71.18                   | 72.7502                      | 72.6829                      |
| 3'  | 167.67                  | 163.0075                     | 162.9033                     |
| 3'a | 104.49                  | 102.8801                     | 101.9659                     |
| 3'b | 143.50                  | 143.8188                     | 144.132                      |
| 4'  | 164.35                  | 159.803                      | 160.6292                     |
| 5'  | 120.80                  | 116.7965                     | 116.9079                     |
| 6'  | 151.44                  | 150.5195                     | 151.2701                     |
| 6'a | 121.14                  | 118.1717                     | 118.0211                     |
| 7'  | 190.96                  | 186.808                      | 186.3034                     |

|     |        |         |          |
|-----|--------|---------|----------|
| 8'  | 68.19  | 68.9508 | 69.0877  |
| 9'  | 76.71  | 81.1778 | 79.6703  |
| 9'a | 51.95  | 54.9099 | 54.937   |
| 10' | 22.14  | 26.39   | 26.1753  |
| OAc | 169.69 | 162.012 | 161.9703 |
| OAc | 20.99  | 20.3961 | 20.3697  |

**Table S6.** Comparison of the Calculated vs. Experimental Proton Resonances for verruculosin B.

| No.         | $\delta_{\text{expt.}}$ | $\delta_{\text{calcd. (R)}}$ | $\delta_{\text{calcd. (S)}}$ |
|-------------|-------------------------|------------------------------|------------------------------|
| 1           | 5.564                   | 5.3599                       | 5.482                        |
| 5           | 6.552                   | 6.4744                       | 6.4509                       |
| 8           | 3.726                   | 3.6375                       | 3.662                        |
| 10          | 2.586                   | 2.7062                       | 2.6628                       |
| 11 $\alpha$ | 2.700                   | 2.3949                       | 2.4052                       |
| 11 $\beta$  | 2.9145                  | 2.3949                       | 2.4052                       |
| 13          | 3.655                   | 3.725                        | 3.1876                       |
| 14          | 2.909                   | 2.8839                       | 3.0938                       |
| 4-OH        | 10.849                  | 11.9491                      | 11.9812                      |
| 1' $\alpha$ | 5.004                   | 4.6314                       | 4.5805                       |
| 1' $\beta$  | 4.8445                  | 4.6314                       | 4.5805                       |
| 5'          | 6.619                   | 6.6017                       | 6.6303                       |
| 8'          | 4.146                   | 4.2534                       | 4.1855                       |
| 9'          | 5.164                   | 4.6307                       | 4.6282                       |
| 10'         | 2.071                   | 2.3695                       | 2.2612                       |
| OAc         | 2.207                   | 1.9529                       | 1.9737                       |
| 4'-OH       | 11.633                  | 12.2598                      | 11.6431                      |

## References

1. Frisch, M.J.; Trucks, G.W.; Schlegel, H.B.; Scuseria, G.E.; Robb, M.A.; Cheeseman, J.R.; Scalmani, G.; Barone, V.; Mennucci, B.; Petersson, G.A.; *et al.* *Gaussian 09*, Revision E.01; Gaussian, Inc.: Wallingford, CT, USA, **2009**.
2. Hanwell, M.D.; Curtis, D.E.; Lonie, D.C.; Vandermeersch, T.; Zurek, E.; Hutchison, G.R. Avogadro: an advanced semantic chemical editor, visualization, and analysis platform . *J. Cheminform.* **2012**, *4*, 1–17.
3. RDKit: Cheminformatics and Machine Learning Software. **2013** [<http://www.rdkit.org>].
4. Smith, S.G; Goodman, J.M. Assigning the Stereochemistry of Pairs of Diastereoisomers Using GIAO NMR Shift Calculation. *J. Org. Chem.* **2009**, *74*, 4597–4607.
5. Smith, S.G; Goodman, J.M. Assigning Stereochemistry to Single Diastereoisomers by GIAO NMR Calculation: The DP4 Probability. *J. Am. Chem. Soc.* **2010**, *132*, 12946–12959.



**S3:  $^1\text{H}$  NMR (600 MHz,  $\text{CDCl}_3$ ) spectrum of verruculosin A (1).**

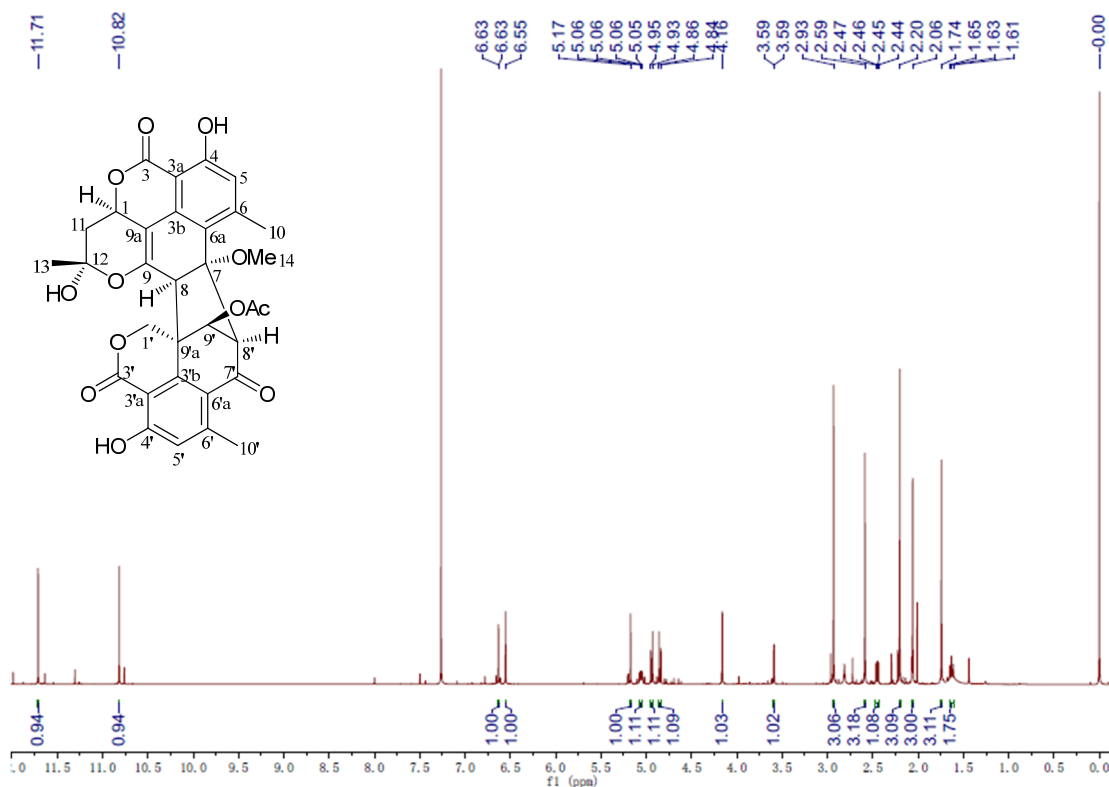

**S4:  $^{13}\text{C}$  NMR (150 MHz,  $\text{CDCl}_3$ ) and DEPT spectra of verruculosin A (1).**

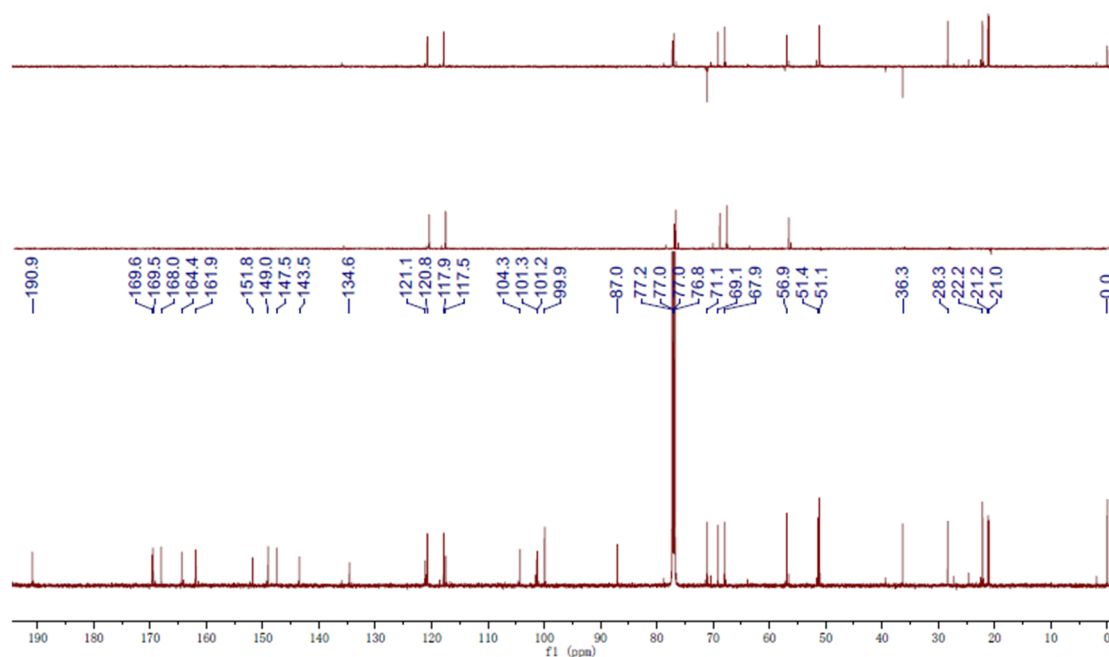

S5: Expanded  $^{13}\text{C}$  NMR (150 MHz,  $\text{CDCl}_3$ ) and DEPT spectra of verruculosin A (1).

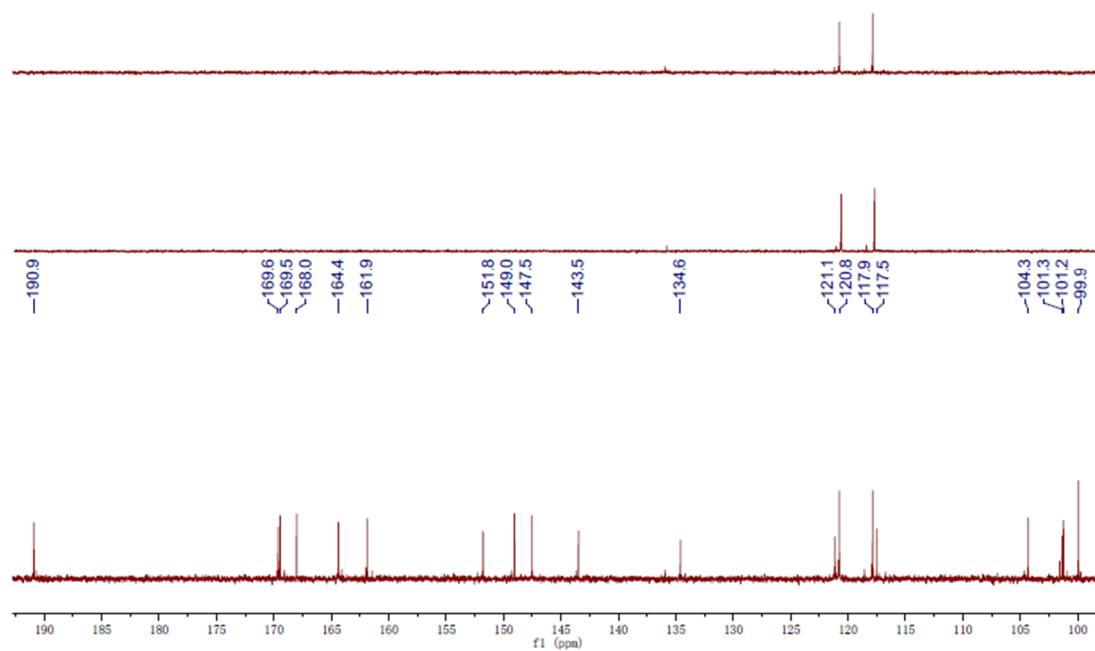

S6: Expanded  $^{13}\text{C}$  NMR (150 MHz,  $\text{CDCl}_3$ ) and DEPT spectra of verruculosin A (1).

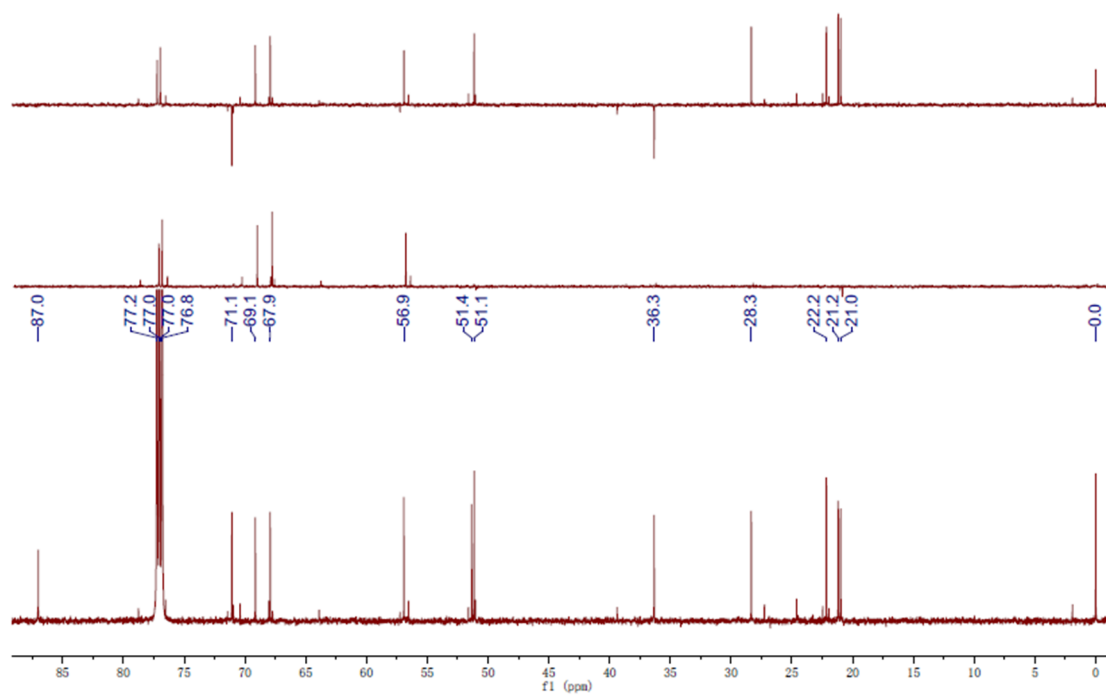

**S7:  $^1\text{H}$ - $^1\text{H}$  COSY NMR spectrum of verruculosin A (1).**

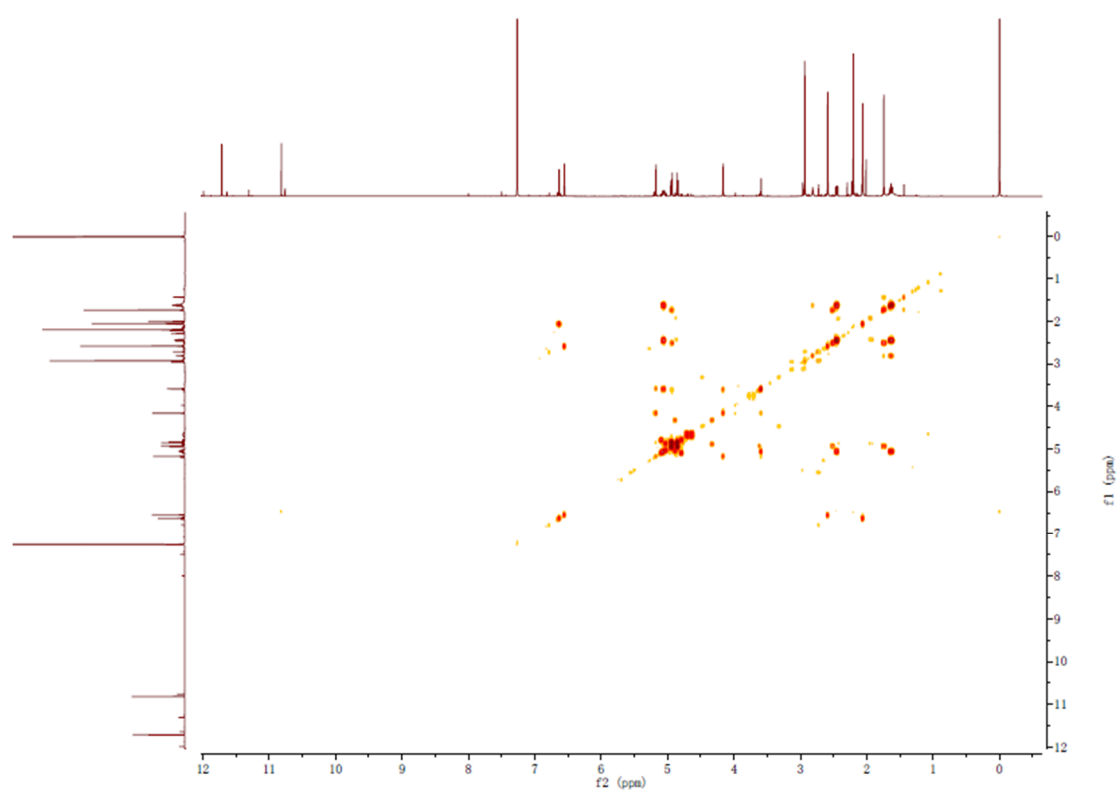

**S8: HSQC NMR spectrum of verruculosin A (1).**

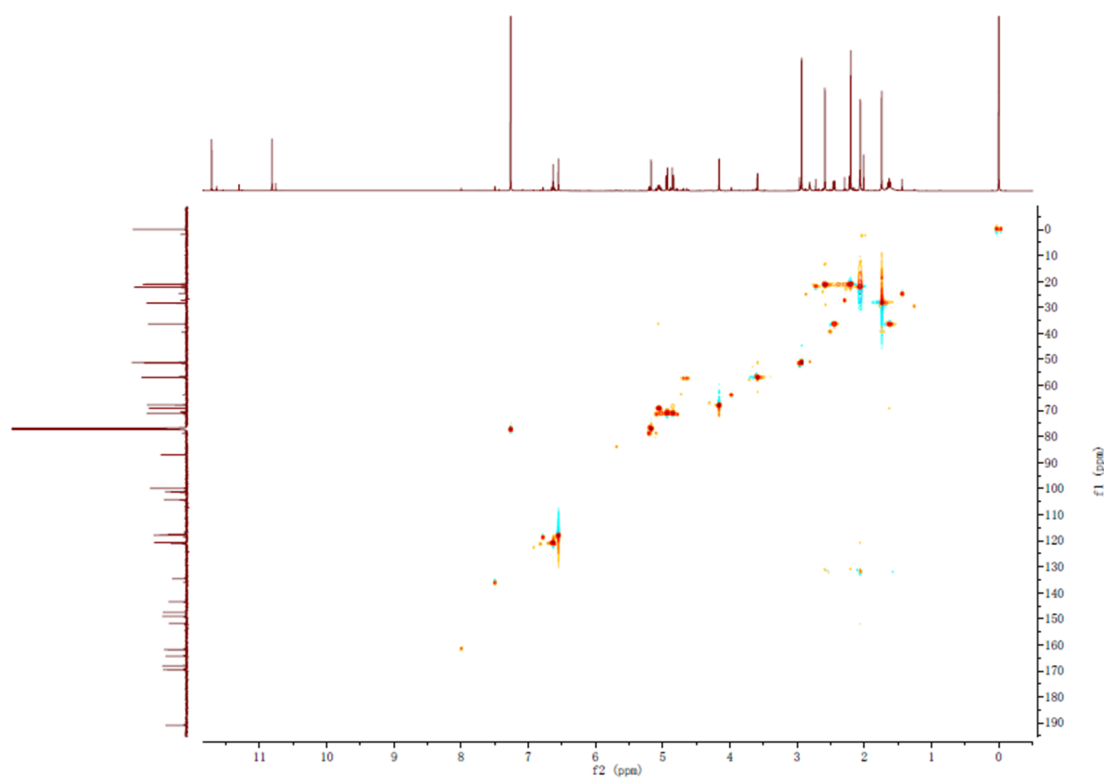

**S9: HMBC NMR spectrum of verruculosin A (1).**

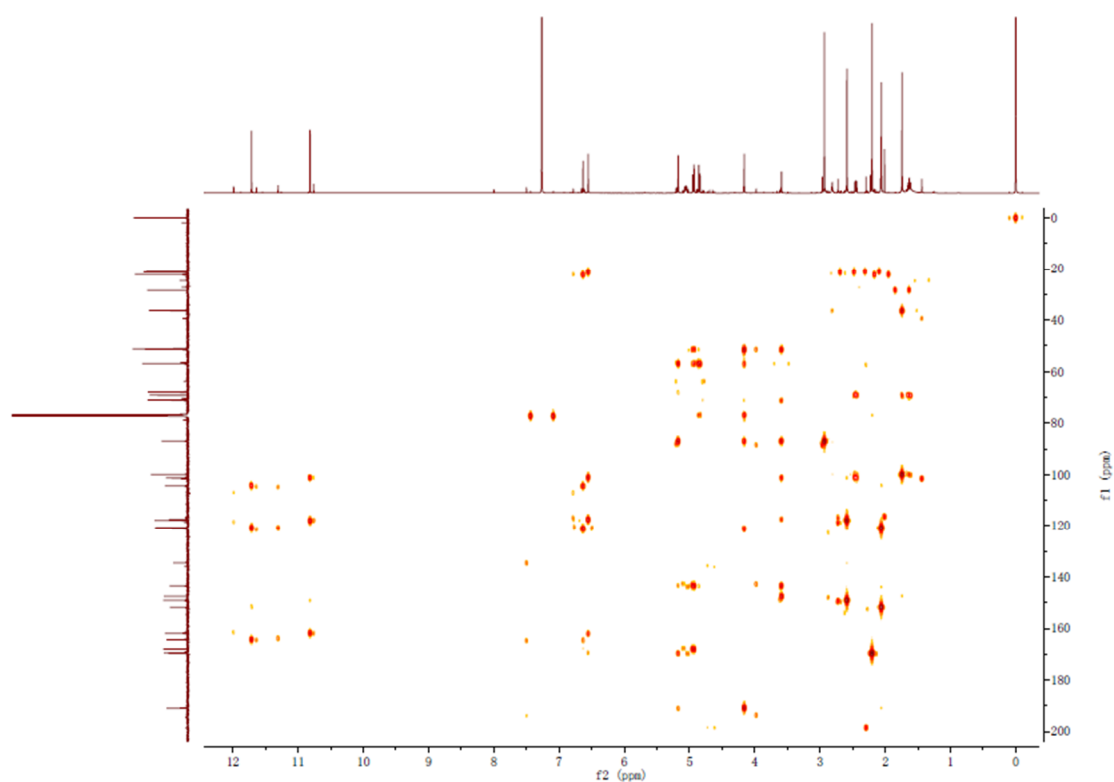

**S10: NOESY NMR spectrum of verruculosin A (1).**

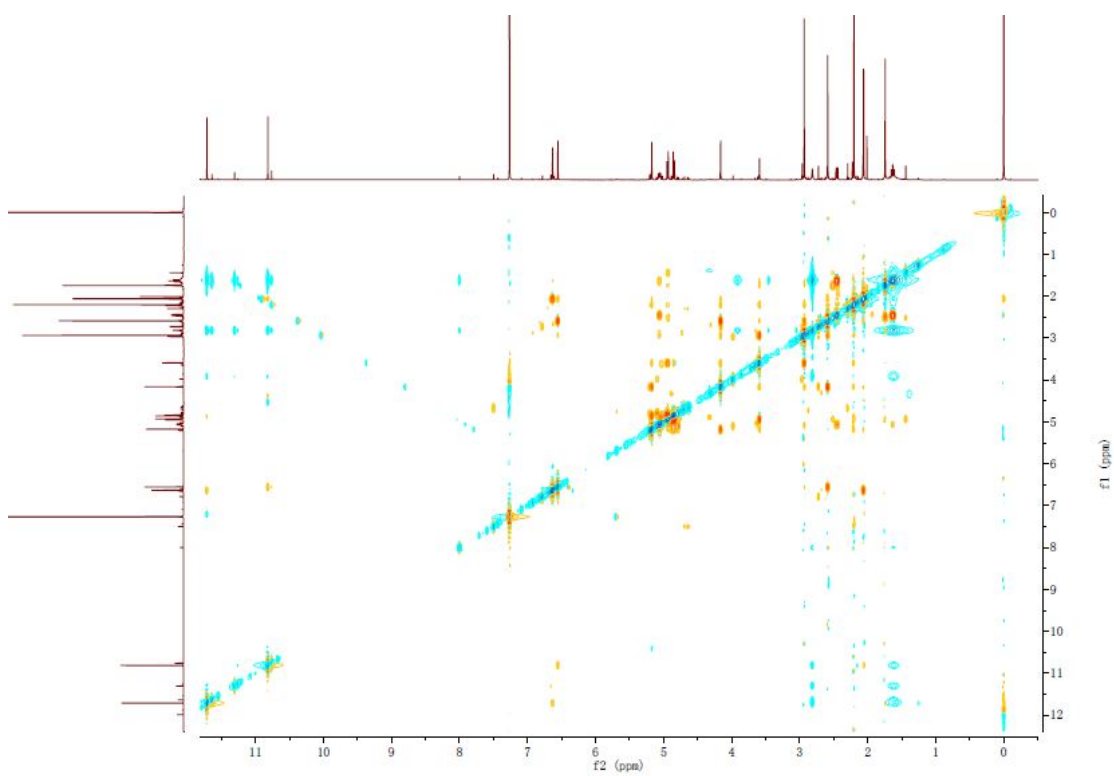

**S11:  $^1\text{H}$  NMR (600 MHz,  $\text{CDCl}_3$ ) spectrum of verruculosin B (2).**

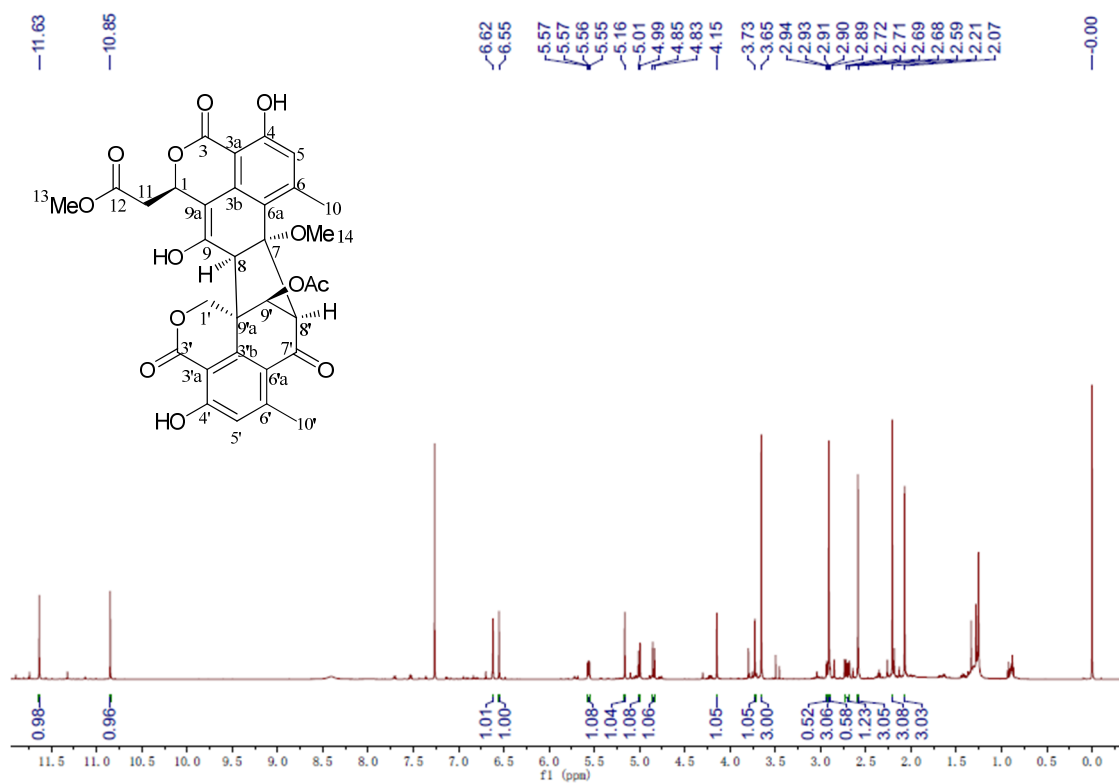

**S12:  $^{13}\text{C}$  NMR (150 MHz,  $\text{CDCl}_3$ ) and DEPT spectra of verruculosin B (2).**

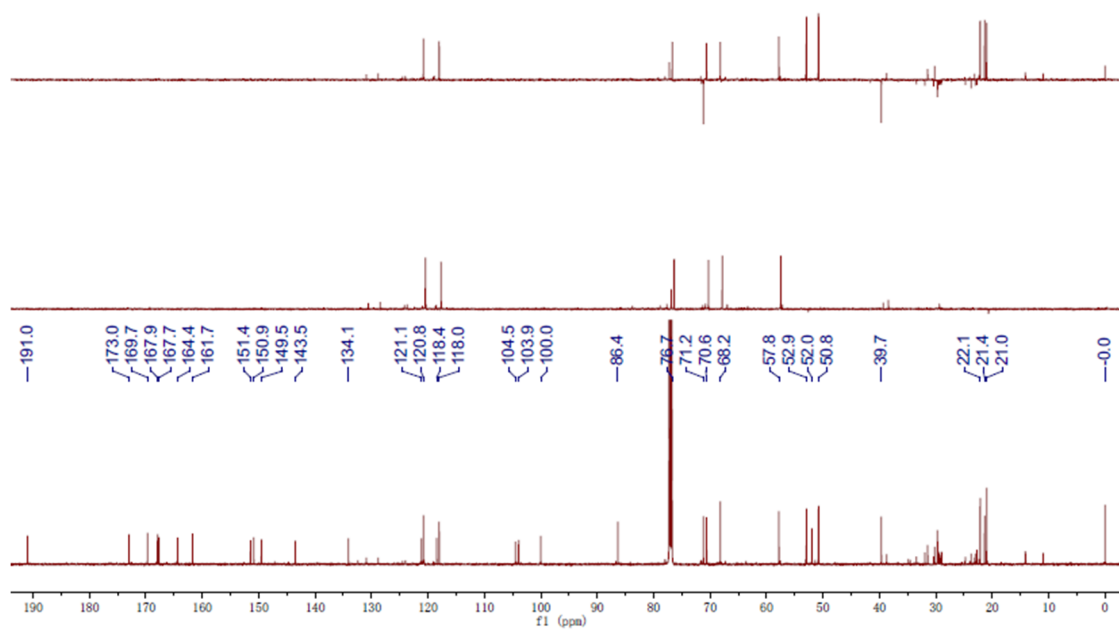

**S13:  $^1\text{H}$ - $^1\text{H}$  COSY NMR spectrum of verruculosin B (2).**

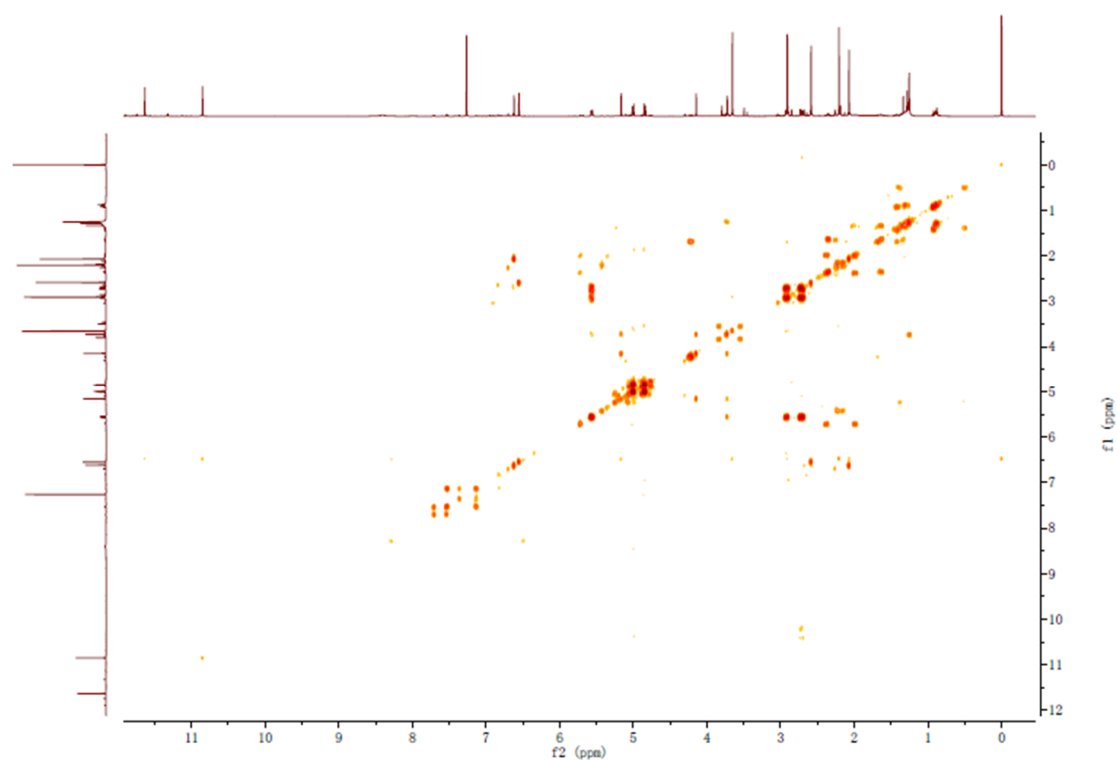

**S14: HSQC NMR spectrum of verruculosin B (2).**

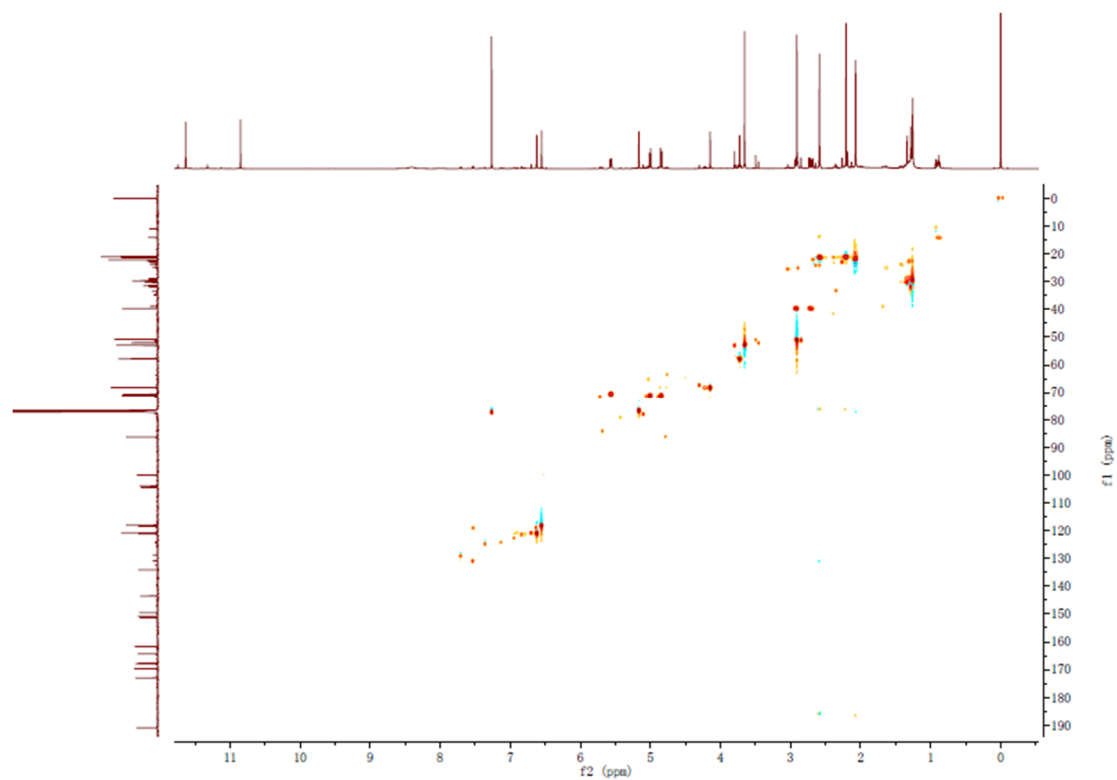

**S15: HMBC NMR spectrum of verruculosin B (2).**

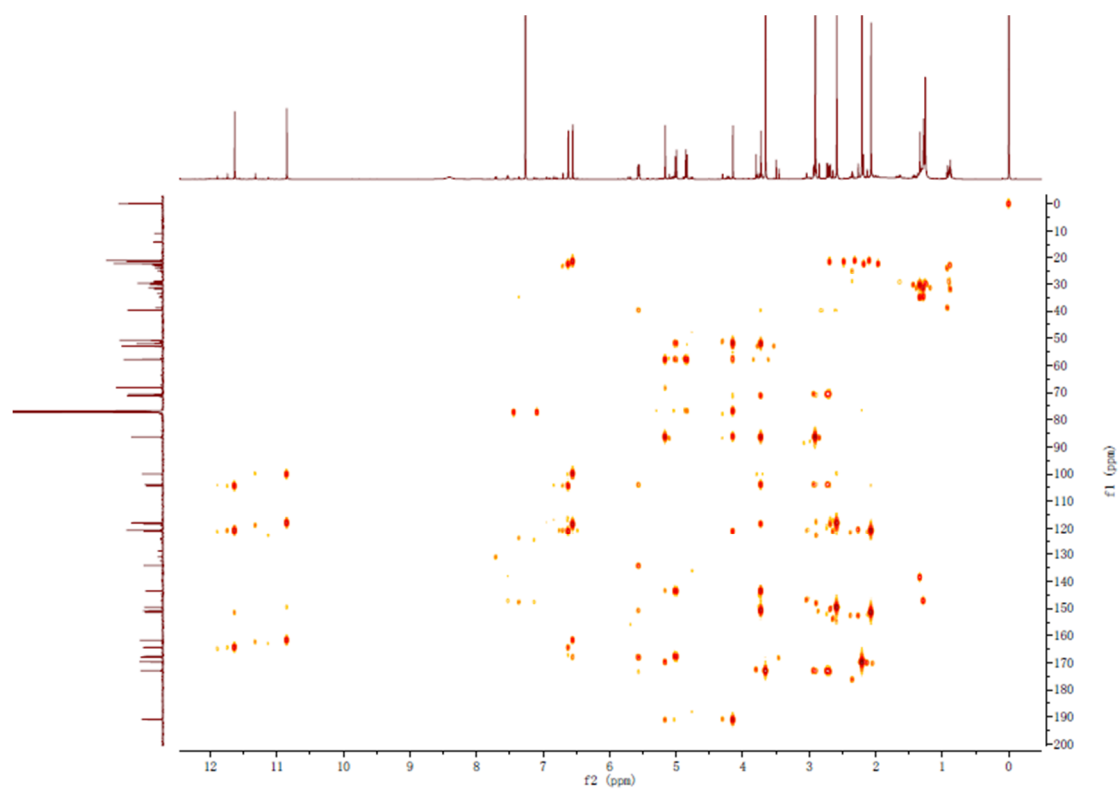

**S16: NOESY NMR spectrum of verruculosin B (2).**

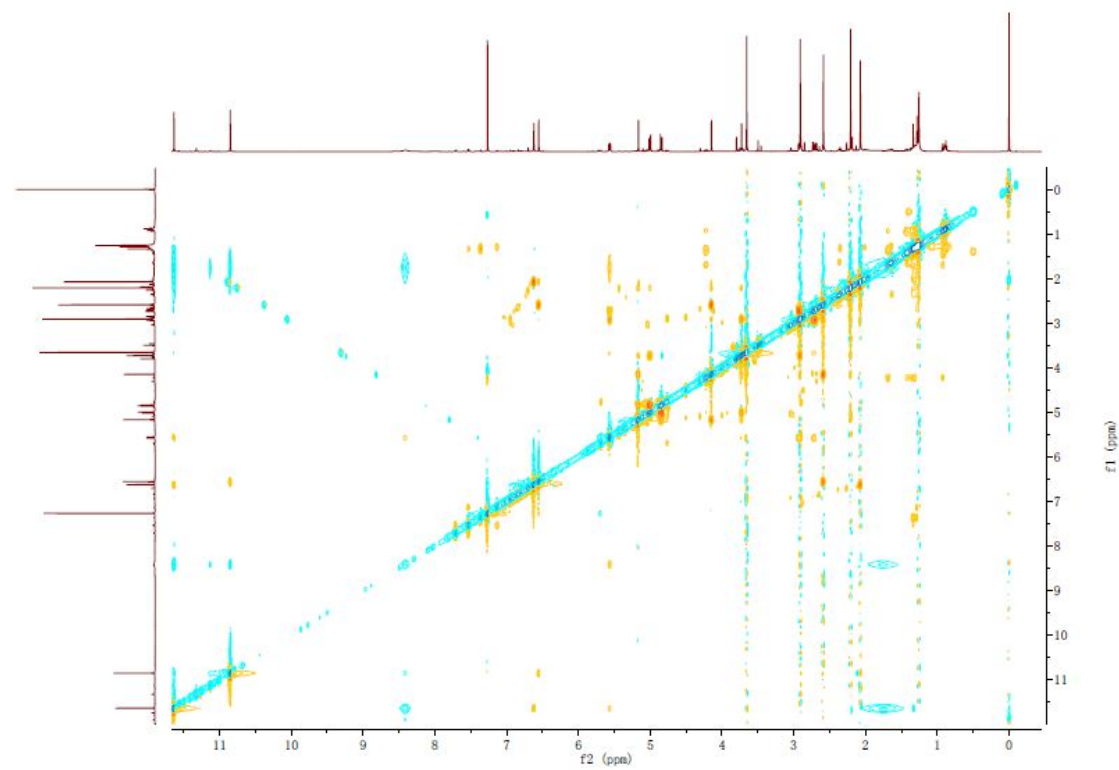

**S17:  $^1\text{H}$  NMR (600 MHz,  $\text{CDCl}_3$ ) spectrum of verruculosin C (3).**

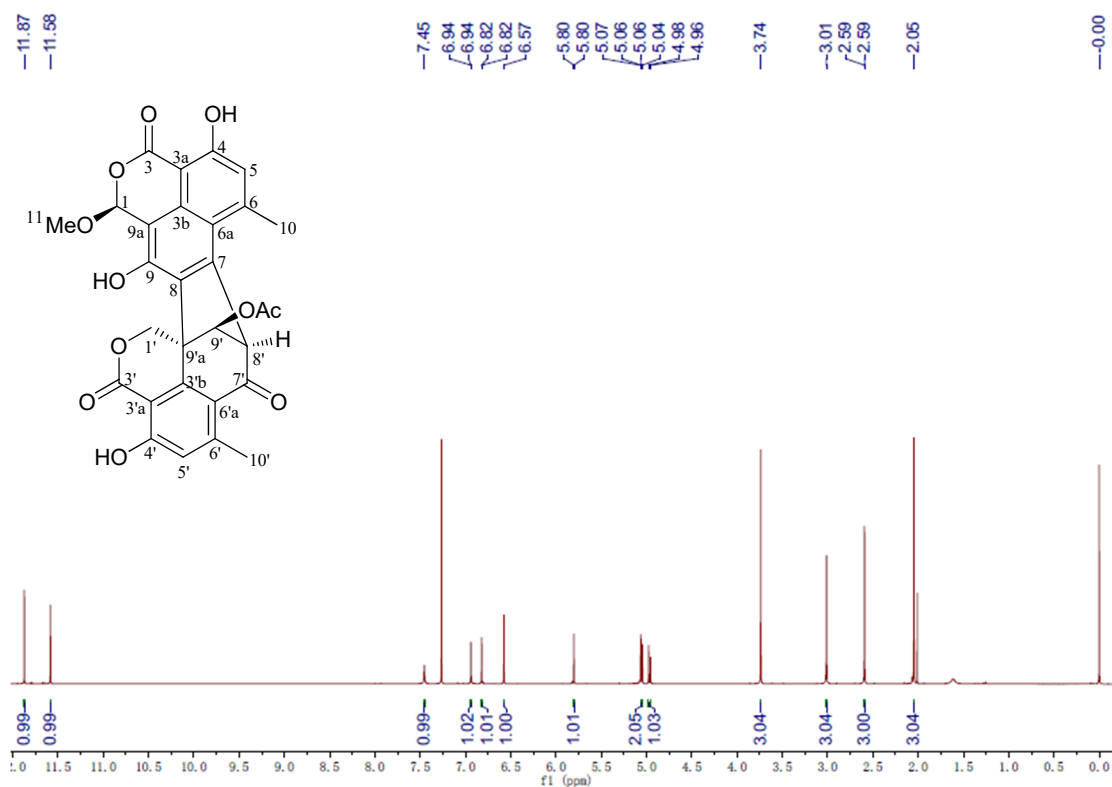

**S18:  $^{13}\text{C}$  NMR (150 MHz,  $\text{CDCl}_3$ ) and DEPT spectra of verruculosin C (3).**

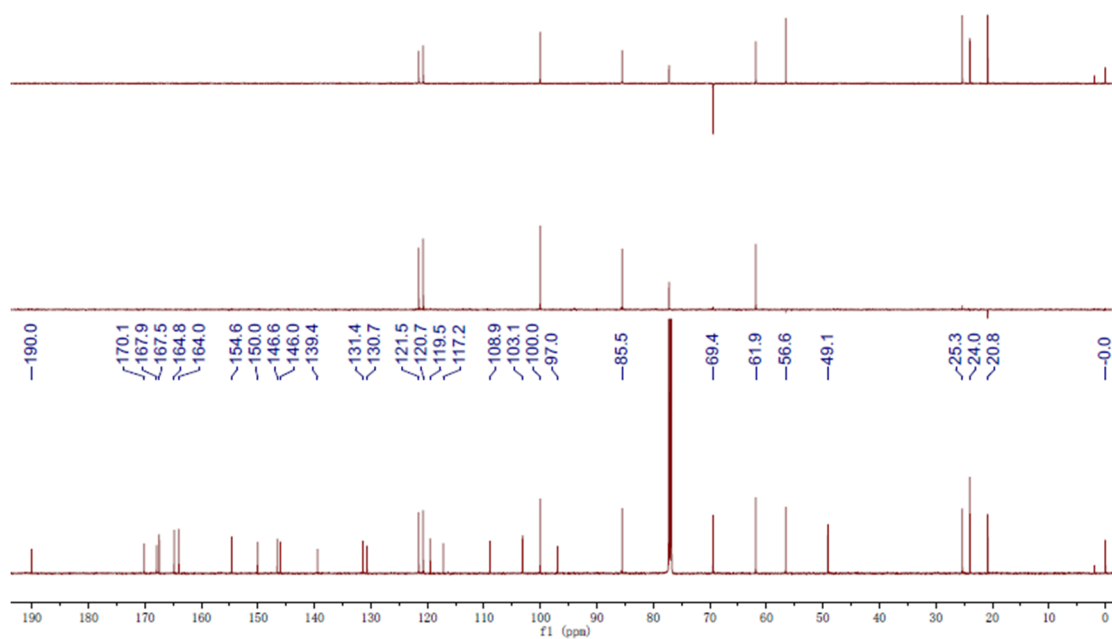



**S19:  $^1\text{H}$ - $^1\text{H}$  COSY NMR spectrum of verruculosin C (3).**

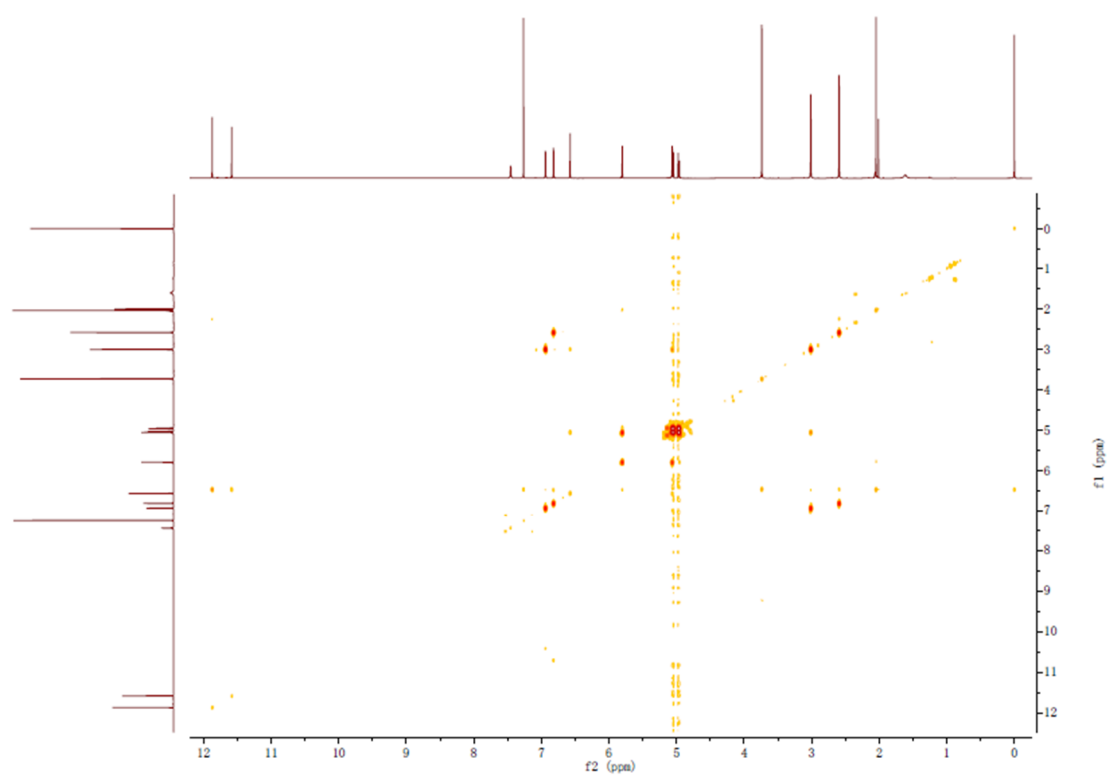

**S20: HSQC NMR spectrum of verruculosin C (3).**

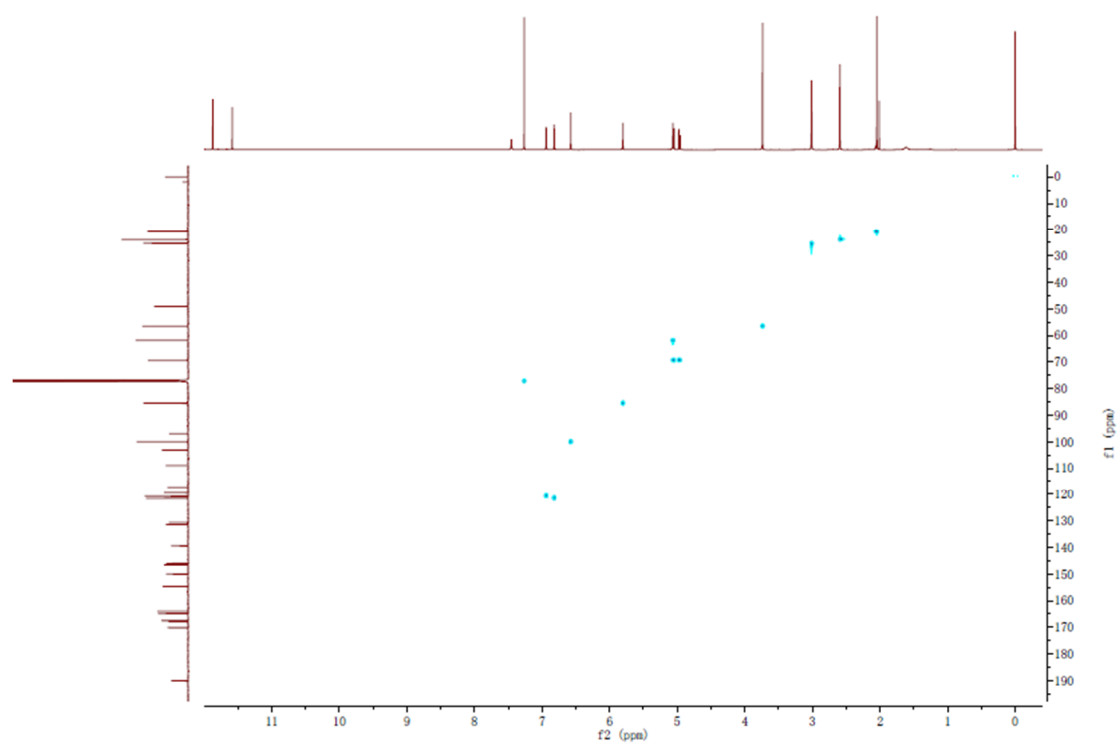

**S21: HMBC NMR spectrum of verruculosin C (3).**

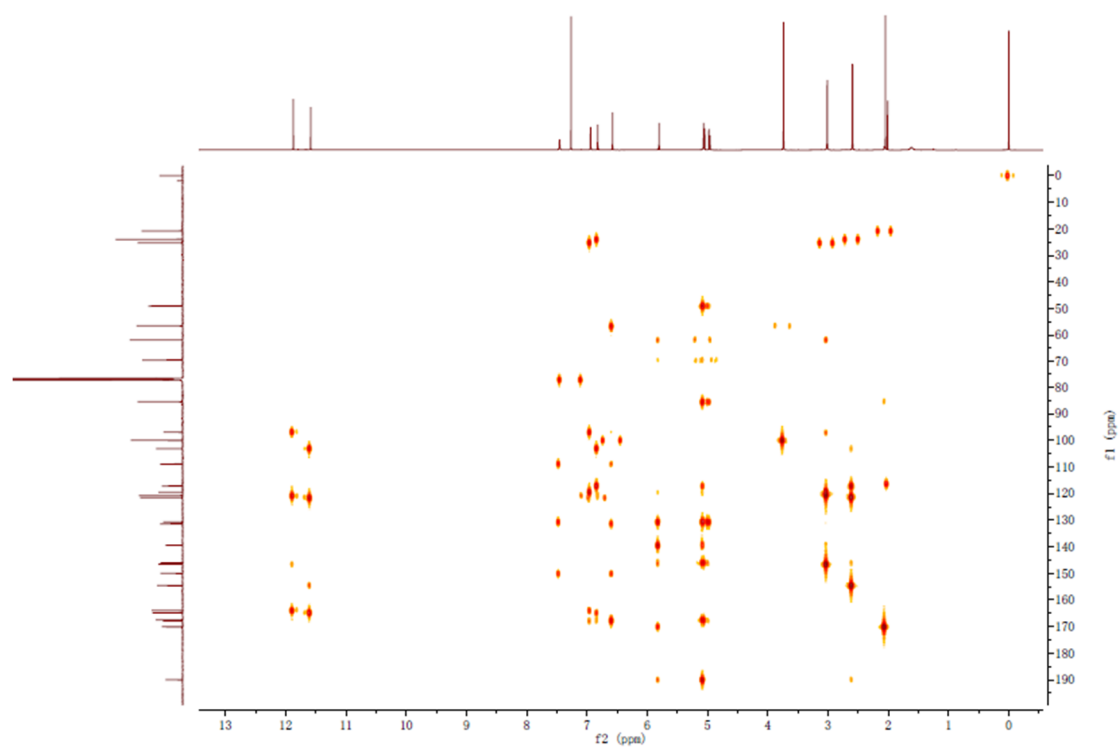

**S22: NOESY NMR spectrum of verruculosin C (3).**

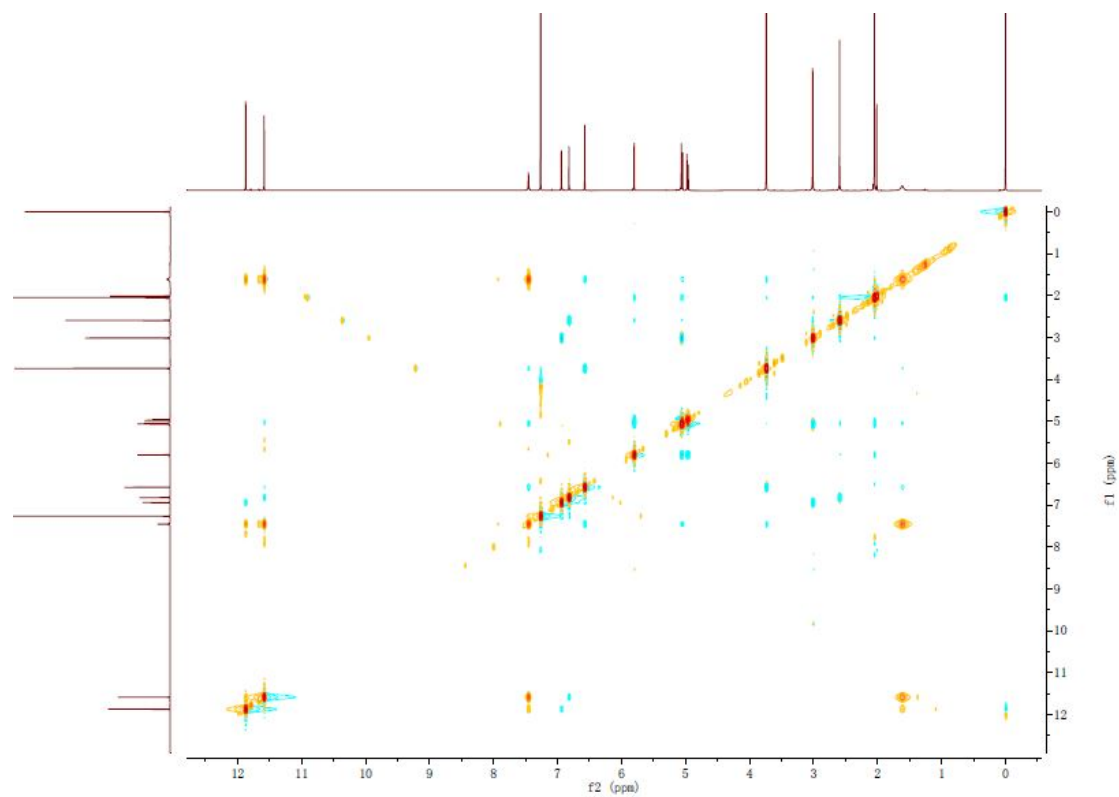

Supplement: s1 [file s1]
